# Supplementary material for: Web-Based, Participant-Driven Studies Yield Novel Genetic Associations for Common Traits
Source: PubMed Central journal article supplement (PMC2891811; doi:10.1371/journal.pgen.1000993), 2010-06-24
Supplement: pgen.1000993.s006.pdf [file pgen.1000993.s006.pdf]

## Web-based, Participant-driven Studies Yield Novel Genetic Associations for Common Traits

Eriksson, Macpherson, Tung, Hon, Naughton, Saxonov, Avey, Wojcicki, Pe'er, Mountain

*PLoS Genetics*, 2010

### S.5 Questions for individual phenotypes

#### S.5.1 Hair curl

Participants were asked one question about hair curl: “Is your hair naturally straight or curly?” The available answer choices and their codings are shown in Figure 1. Answer choices were presented as a picture with descriptive text but without the coding. Analysis used these codings in a linear regression.

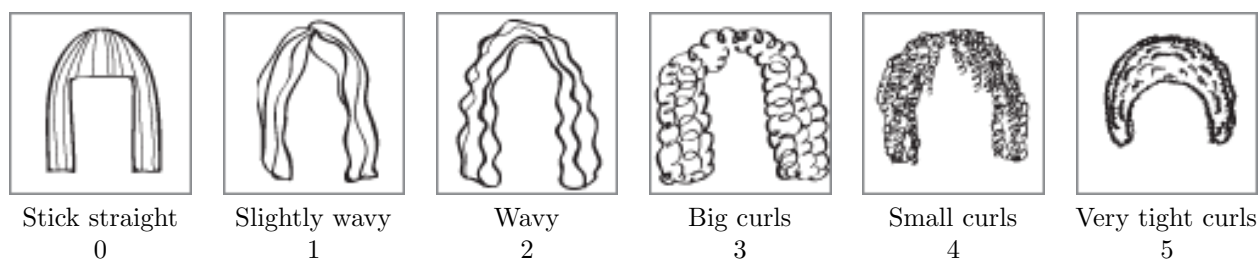

**Figure 1.** Pictures used to assess hair curl

#### S.5.2 Freckling

Participants were asked the following questions, with options shown in Figure 2. The numerical scores were not displayed on the questionnaire.

- The freckling (not moles—moles can be present at birth and can form even in parts of the body not exposed to the sun) on my face is most similar to:
- The freckling (not moles) on my arms is most similar to:
- The freckling (not moles) on my shoulders is most similar to:

#### S.5.3 Hair color

The hair color phenotypes were based on two questions. In addition, a third question was used in order to test the consistency of responses.

1. I would describe the amount of red in my hair (before I went gray, if I am gray now) as:
  - No red at all
  - A tinge of red
  - Some red
  - A lot of red
2. The natural color of my hair (before I went gray, if I am gray now) is most similar to:
  - I don't know

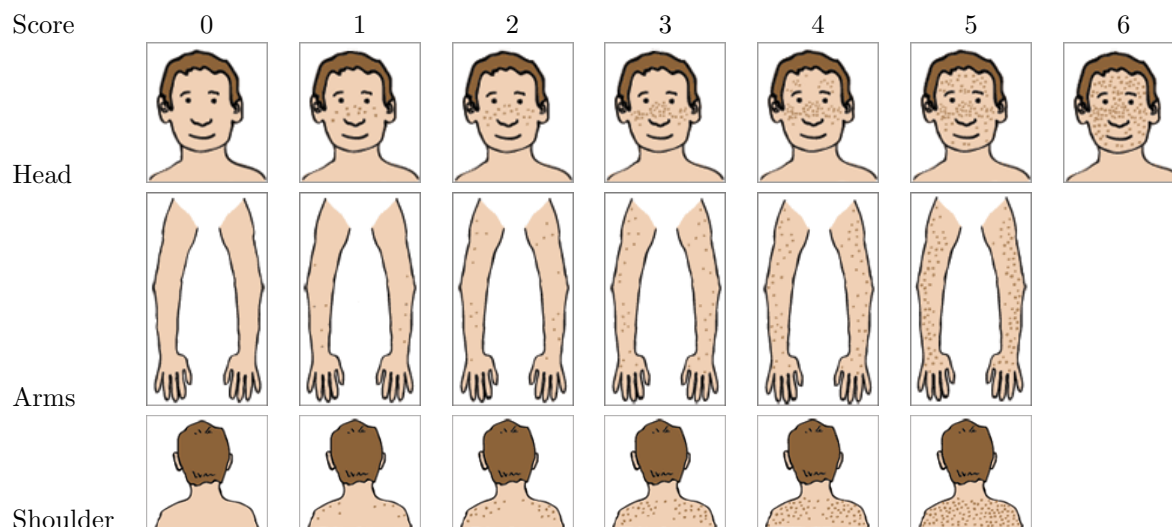

**Figure 2.** Freckling was scored on a scale from 0 to 16 as the sum of the scores on the face, arms, and shoulders.

- One of the 9 pictures in Figure 3.

3. I would describe the natural color of my hair (before I went gray, if I am gray now) as:

- Light blond
- Dark blond
- Red
- Light brown
- Dark brown
- Black
- I don't know

#### S.5.4 Eye color

The eye color analyses were based on participants matching their eye color to a series of pictures.

They were asked to “Look very closely at the color of your eyes, preferably under bright natural light. Then complete the following: the image that most closely resembles the color of my eyes is:” with the pictures in Figure 4 (without text) as answer options, along with “None of the below, because my eyes are totally different colors from each other.” People giving this answer were removed.

#### S.5.5 Muscle performance

The question “Do you think you'd perform better in a sprint or in a longer distance race?” was asked. Available answers were

- Sprint race
- Longer distance race

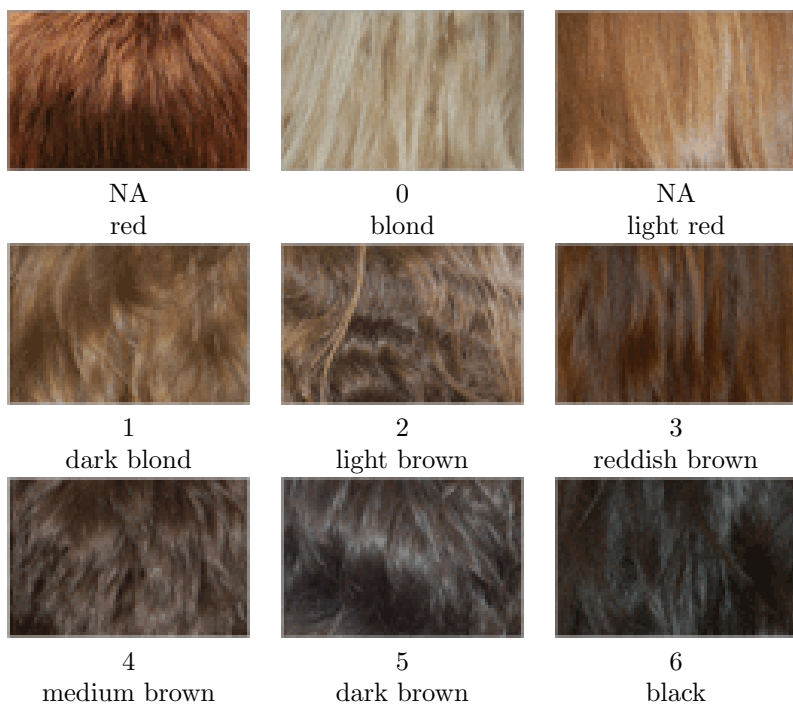

**Figure 3.** Images for hair color used for the blond to brown analysis excluding red. Scorings are shown here but were not shown on the questionnaire.

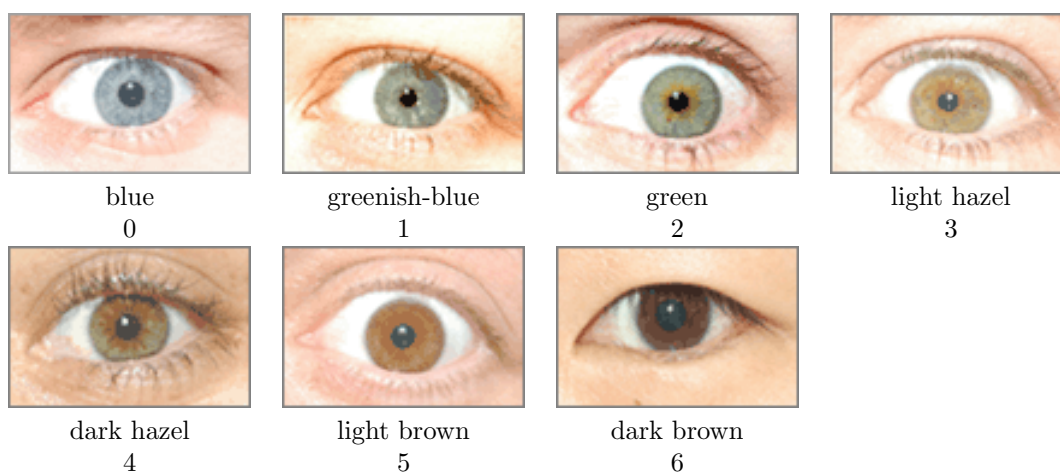

**Figure 4.** Images for eyecolor. Eyecolor was scored on a scale from 0 to 6.

|           | Genotypes Unseen |     | Genotypes Seen |     |
|-----------|------------------|-----|----------------|-----|
|           | CC or TC         | TT  | CC or TC       | TT  |
| Sprint    | 480              | 107 | 1052           | 113 |
| Endurance | 386              | 103 | 530            | 290 |

**Table 1.** Counts of respondents by genotype at rs1815739 according to whether they had seen a prediction based on their genotype or not.

- Both—I’m like the wind
- Neither

For the analysis (Results, Phenotype Data), people answering “Both” or “Neither” were disregarded.

## References

1. Elias LJ, Bryden MP, Bulman-Fleming MB (1998) Footedness is a better predictor than is handedness of emotional lateralization. *Neuropsychologia* 36: 37-43.
2. Annett M (1970) A classification of hand preference by association analysis. *Br J Psychol* 61: 303-321.
3. Miles WR (1929) Ocular dominance demonstrated by unconscious sighting. *J Exp Psych* : 113-126.
4. Scheier MF, Carver CS, Bridges MW (1994) Distinguishing optimism from neuroticism (and trait anxiety, self-mastery, and self-esteem): a reevaluation of the life orientation test. *J Pers Soc Psychol* 67: 1063-1078.

| Phenotype                  | Question                                                                                                      | Scoring                                                                                                                                       |
|----------------------------|---------------------------------------------------------------------------------------------------------------|-----------------------------------------------------------------------------------------------------------------------------------------------|
| Astigmatism                | “Have you ever been told by a doctor that you have astigmatism?”                                              | Binary                                                                                                                                        |
| Braces                     | “Have you ever been told by a dentist that you needed braces to straighten your teeth?”                       | Binary                                                                                                                                        |
| Cavities                   | “Have you ever had any cavities?”                                                                             | Scored as QT: 2 = Yes, more than three / 1 = Yes, but three or fewer / 0 = No, I’m a dental superstar! / NA = I don’t know                    |
| Earlobes                   | ”Are your earlobes attached or unattached?”                                                                   | Binary                                                                                                                                        |
| Footedness                 | 10 question survey from [1]                                                                                   | Scored as QT                                                                                                                                  |
| Glasses                    | “Have you ever had to wear contact lenses or eye glasses?”                                                    | Binary                                                                                                                                        |
| Hand-clasp                 | “When you clasp your hands together comfortably, which thumb is on top?”                                      | Binary                                                                                                                                        |
| Handedness                 | survey from [2]                                                                                               | 8 point scoring system from [2]                                                                                                               |
| Morning/evening preference | “Are you naturally a night person or a morning person?”                                                       | Night owl / Early bird / Neither                                                                                                              |
| Motion sickness            | “Have you experienced motion sickness while riding in a car (car sickness)?”                                  | CASE = Yes, I do now frequently / CASE = Yes, I did frequently, but only as a child / NA = Yes, occasionally / CONTROL = No / NA = Don’t know |
| Ocular dominance           | single question from [3]                                                                                      | Binary                                                                                                                                        |
| Optimism                   | survey from [4]                                                                                               | scored as QT                                                                                                                                  |
| Wisdom teeth               | “Have you ever been told by a dentist that you needed to have your wisdom teeth removed for medical reasons?” | Binary                                                                                                                                        |

**Table 2.** Questions for traits not described elsewhere.
