# Supplementary material for: Web-Based, Participant-Driven Studies Yield Novel Genetic Associations for Common Traits
Source: PubMed Central journal article supplement (PMC2891811; doi:10.1371/journal.pgen.1000993), 2010-06-24
Supplement: pgen.1000993.s007.pdf [file pgen.1000993.s007.pdf]

# Web-based, Participant-driven Studies Yield Novel Genetic Associations for Common Traits

Eriksson, Macpherson, Tung, Hon, Naughton, Saxonov, Avey, Wojcicki, Pe'er, Mountain

*PLoS Genetics*, 2010

## S.6 Details for specific associations

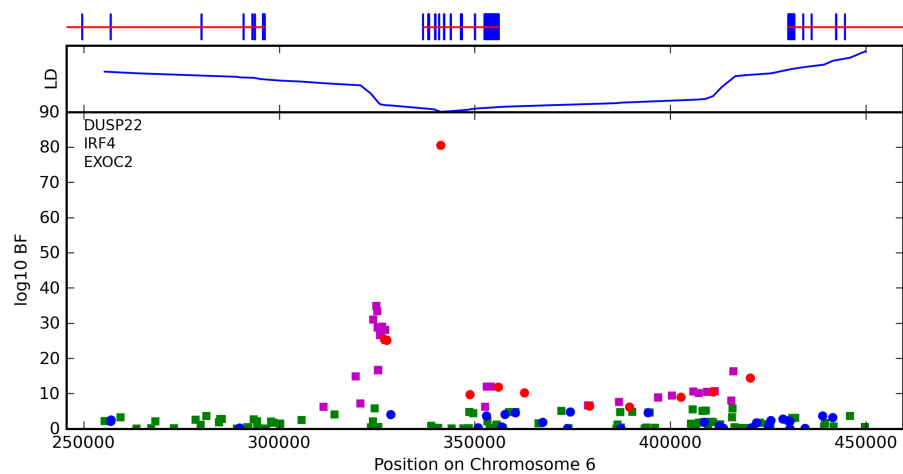

(a) Bayes factors around *IRF4*

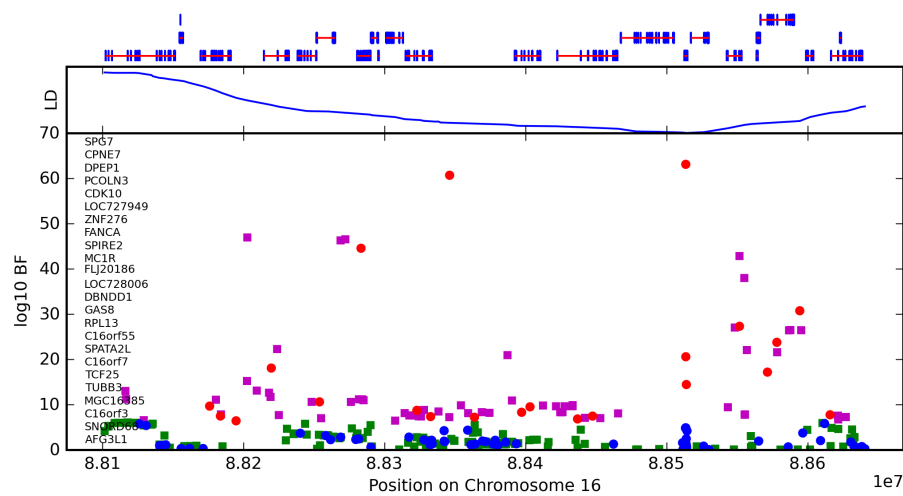

(b) Bayes factors around *MC1R*

**Figure 1.** Bayes factors for freckling around *IRF4* and *MC1R*

| Phenotype                  | Size | Cases | Controls | Covariates    | $\lambda$ | Top hit | # Loci | Loci                                             |
|----------------------------|------|-------|----------|---------------|-----------|---------|--------|--------------------------------------------------|
| Eye color, blue to brown   | 4402 | —     | —        | pca, sex, age | 1.00      | > 300   | 6      | OCA2/HERC2, SLC24A4, IRF4, SLC45A2, TYR, (TYRPI) |
| Freckles                   | 4405 | —     | —        | pca, sex, age | 1.01      | 90.68   | 5      | <i>IRF4</i> , MC1R, ASIP, <b>BNC2</b> , (TYR)    |
| Hair color, blond to brown | 3044 | —     | —        | pca, sex, age | 1.01      | 87.07   | 5      | OCA2/HERC2, IRF4, SLC45A2, SLC24A4, MC1R         |
| Red hair                   | 4422 | —     | —        | pca, sex, age | 1.01      | 86.28   | 2      | MC1R, ASIP                                       |
| Eye color, green/blue      | 2826 | 1505  | 1321     | sex, age      | 1.00      | 51.52   | 3      | OCA2/HERC2, SLC24A4, TYR                         |
| Hair curl                  | 5385 | —     | —        | pca, sex, age | 1.02      | 41.80   | 3      | TCHH, <b>WNT10A</b> , ( <b>OFCC1</b> )           |
| Asparagus anosmia          | 4742 | 1737  | 3005     | pca, age      | 1.02      | 23.18   | 1      | <b>OR2M7</b>                                     |
| Photic sneeze reflex       | 5390 | 1750  | 3640     | age           | 1.02      | 10.93   | 2      | <b>2q22-3</b> , ( <b>NR2F2</b> )                 |
| Footedness                 | 3079 | —     | —        | pca, sex, age | 1.00      | 6.75    | 0      |                                                  |
| Attached earlobes          | 3915 | 2940  | 975      | sex           | 1.01      | 6.59    | 0      |                                                  |
| Morningness                | 4264 | 2028  | 2237     | pca, sex, age | 1.01      | 6.50    | 0      |                                                  |
| Braces                     | 4011 | 1951  | 2062     | sex, age      | 1.01      | 6.45    | 0      |                                                  |
| Optimism                   | 3936 | —     | —        | sex, age      | 1.00      | 6.29    | 0      |                                                  |
| Astigmatism                | 7701 | 3982  | 3727     | sex, age      | 1.01      | 6.17    | 0      |                                                  |
| Prefer sweet snacks        | 3100 | 1484  | 1616     | sex           | 1.03      | 6.07    | 0      |                                                  |
| Wisdom teeth               | 3983 | 1210  | 2773     | sex, age      | 1.00      | 5.89    | 0      |                                                  |
| Cavities                   | 5366 | —     | —        | sex, age      | 1.01      | 5.81    | 0      |                                                  |
| Glasses                    | 5386 | 947   | 4440     | sex, age      | 1.00      | 5.76    | 0      |                                                  |
| Ocular dominance           | 3126 | 1956  | 1170     | None          | 1.00      | 5.70    | 0      |                                                  |
| Hand-clasp                 | 5256 | 2280  | 2977     | sex, age      | 1.00      | 5.66    | 0      |                                                  |
| Motion sickness            | 2987 | 963   | 2024     | sex, age      | 1.02      | 5.55    | 0      |                                                  |
| Handedness                 | 4268 | —     | —        | sex, age      | 1.00      | 5.30    | 0      |                                                  |

**Table 1. Statistics on the 22 studies (with or without associations reaching genome-wide significance).** Loci are called significant if they contain a SNP with  $-\log_{10}$  p-value over 8.4 and suggestively significant if they have one between 7.1 and 8.4. Loci that were not previously associated with the given trait are in bold, those where we report a remapping of a previous hit are in italics, and suggestively significant loci are in parentheses. Size refers to the total number of individuals in the study. For binary traits, we additionally report the number of cases and controls. The listed covariates were included in the analysis (if “pca” is listed as a covariate the first five axes of genetic variation within northern Europe were used). The “top hit” refers to the largest  $-\log_{10}$  p-value for the given trait. We report the genomic control inflation factor,  $\lambda$ , [1] for the analysis including covariates.

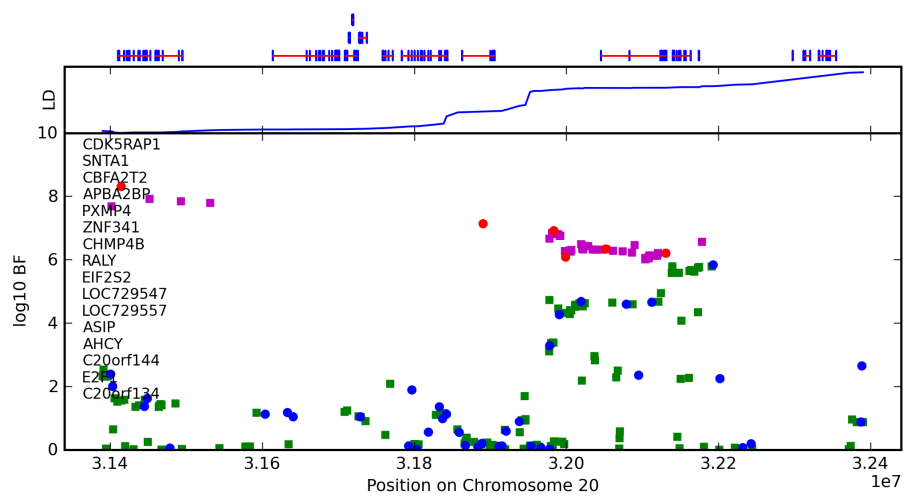(a) Bayes factors around *ASIP*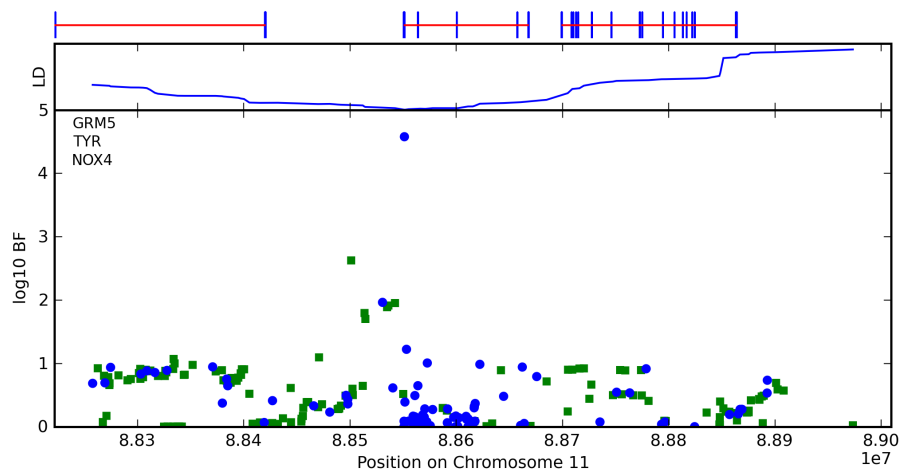(b) Bayes factors around *TYR***Figure 2.** Bayes factors for freckling around *ASIP* and *TYR*

|    | TT (%)     | TC (%)     | CC (%)     |
|----|------------|------------|------------|
| 0  | 391 (25.3) | 628 (29.9) | 233 (31.0) |
| 1  | 242 (15.6) | 375 (17.9) | 137 (18.2) |
| 2  | 267 (17.3) | 383 (18.3) | 151 (20.1) |
| 3  | 173 (11.2) | 227 (10.8) | 77 (10.2)  |
| 4  | 108 (7.0)  | 133 (6.3)  | 37 (4.9)   |
| 5  | 89 (5.8)   | 88 (4.2)   | 33 (4.4)   |
| 6  | 65 (4.2)   | 56 (2.7)   | 20 (2.7)   |
| 7  | 50 (3.2)   | 48 (2.3)   | 22 (2.9)   |
| 8  | 42 (2.7)   | 42 (2.0)   | 9 (1.2)    |
| 9  | 26 (1.7)   | 25 (1.2)   | 11 (1.5)   |
| 10 | 20 (1.3)   | 26 (1.2)   | 7 (0.9)    |
| 11 | 18 (1.2)   | 17 (0.8)   | 6 (0.8)    |
| 12 | 20 (1.3)   | 17 (0.8)   | 2 (0.3)    |
| 13 | 11 (0.7)   | 9 (0.4)    | 1 (0.1)    |
| 14 | 11 (0.7)   | 9 (0.4)    | 4 (0.5)    |
| 15 | 8 (0.5)    | 6 (0.3)    | 0 (0.0)    |
| 16 | 6 (0.4)    | 9 (0.4)    | 2 (0.3)    |

**Table 2. Counts for freckling versus genotype at rs2153271 (in *BNC2*).** Higher scores correspond to more freckles.

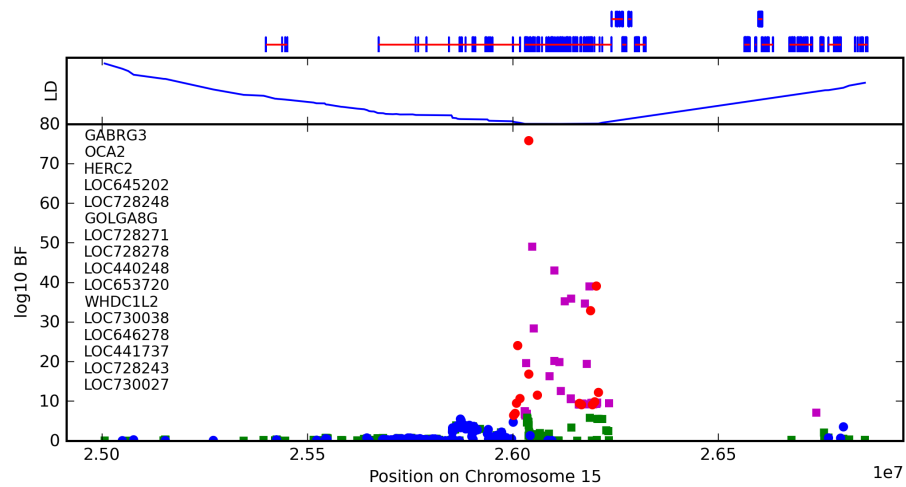

(a) Bayes factors around OCA2

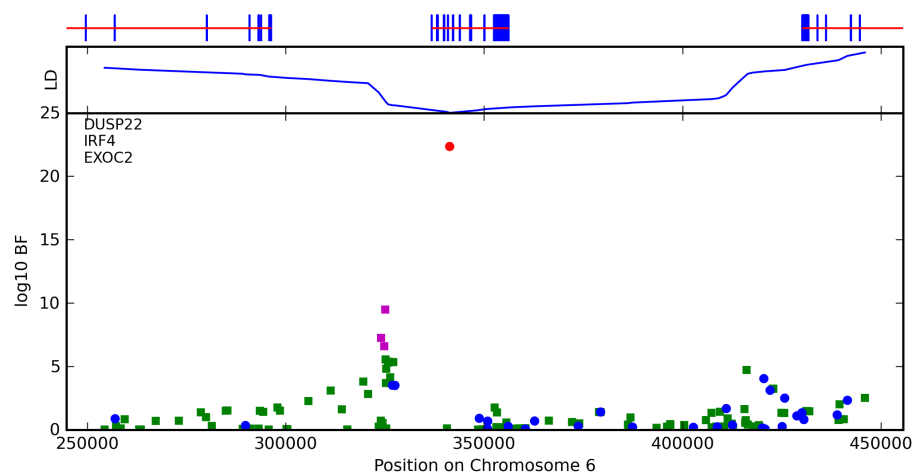

(b) Bayes factors around IRF4

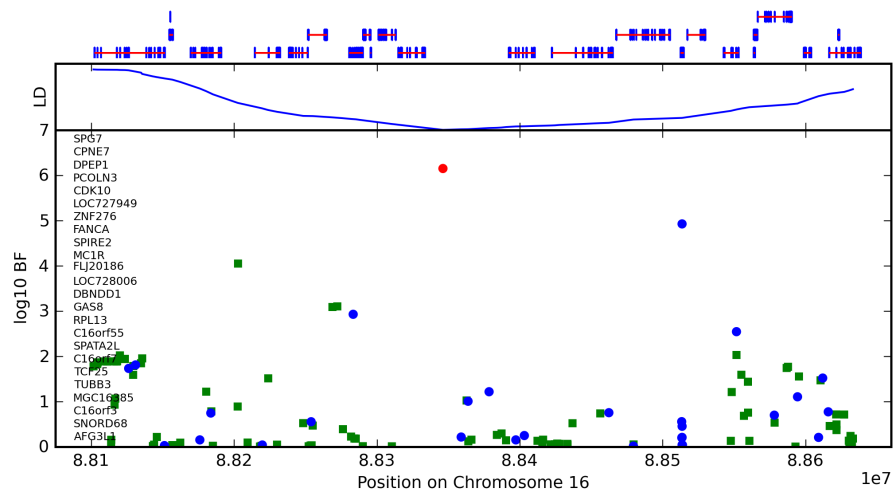

(c) Bayes factors around MC1R

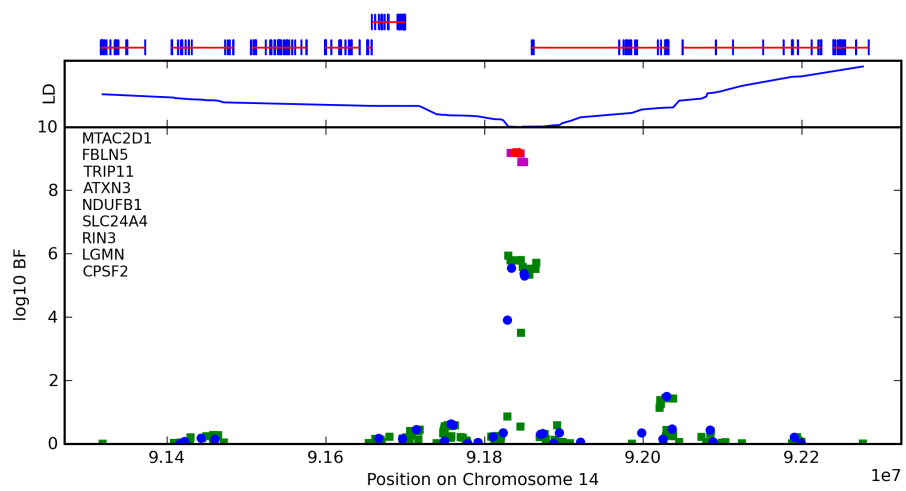

(d) Bayes factors around SLC24A4

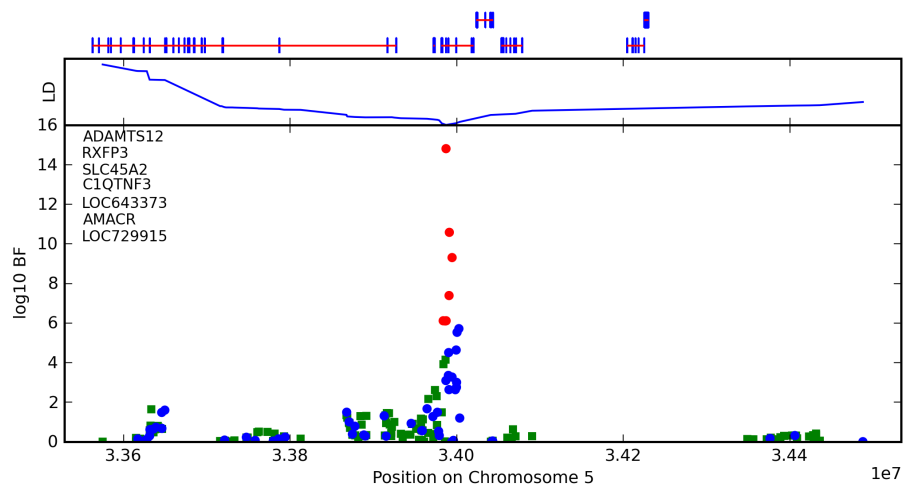

(e) Bayes factors around SLC45A2

**Figure 3.** Region plots for hair color, blond to brown

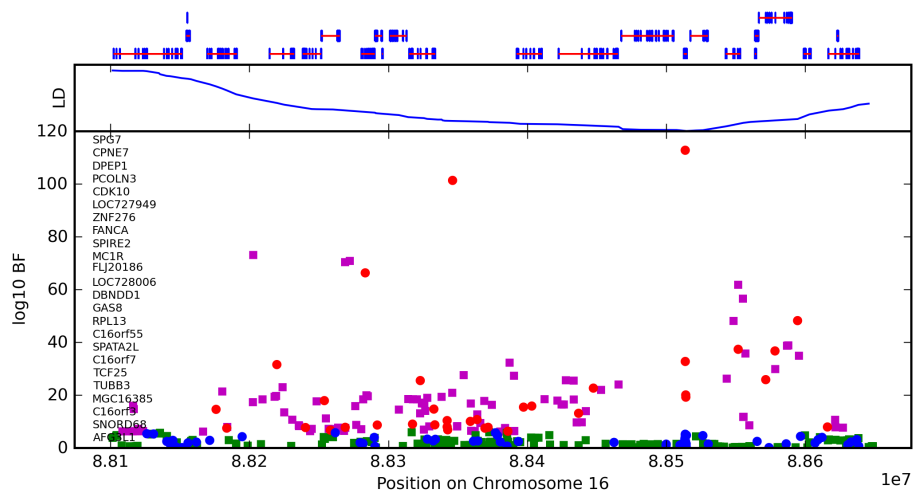

(a) Bayes factors around MC1R

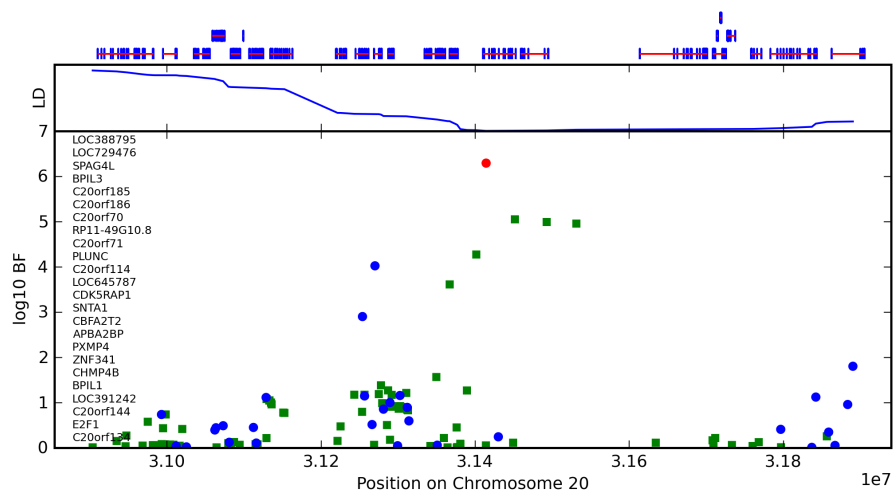

(b) Bayes factors around ASIP

Figure 4. Region plots for red hair color

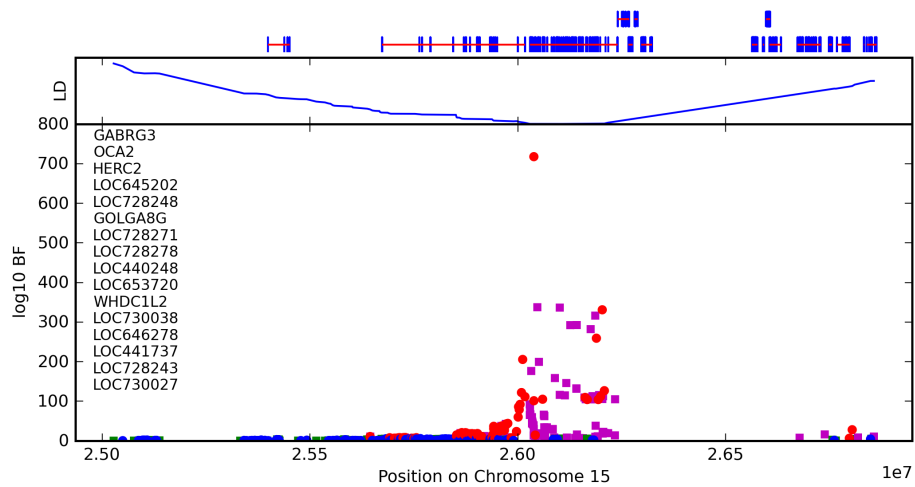

(a) Bayes factors around OCA2

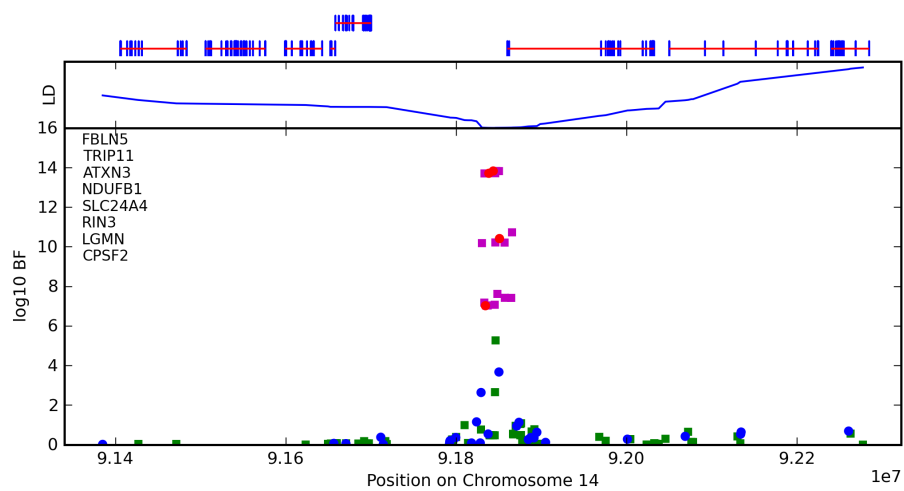

(b) Bayes factors around SLC24A4

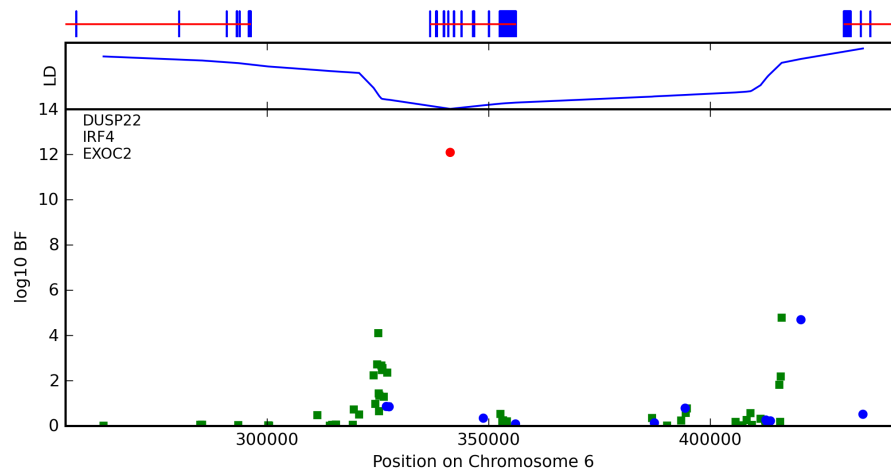

(c) Bayes factors around IRF4



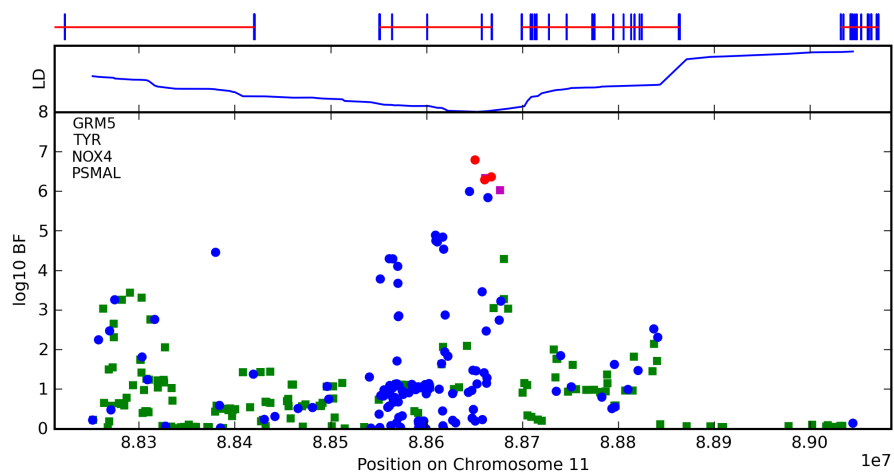

(d) Bayes factors around TYR

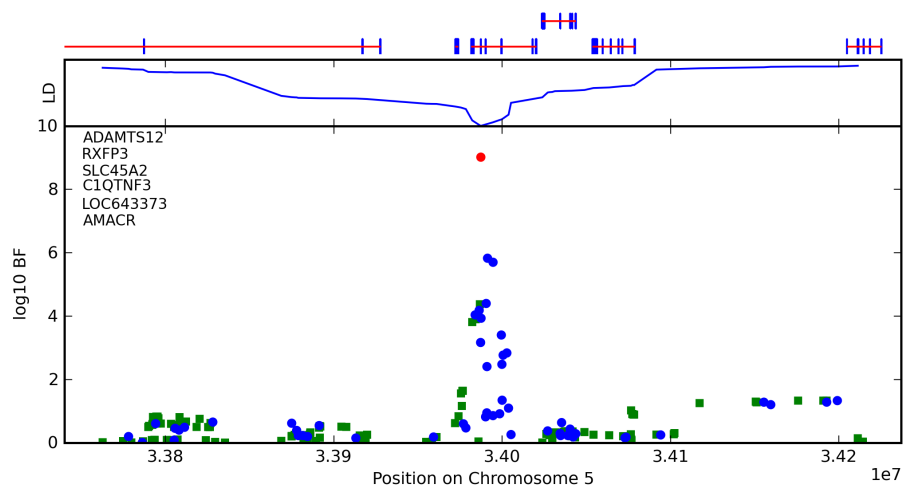

(e) Bayes factors around SLC45A2

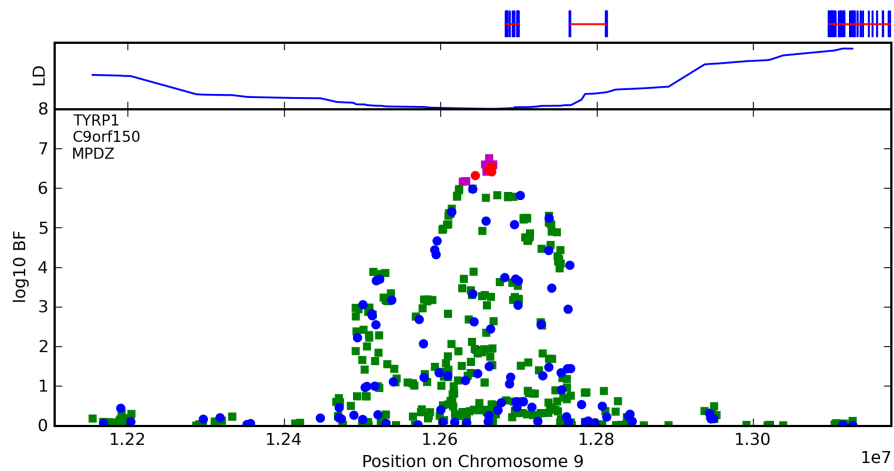

(f) Bayes factors around TYRP1

**Figure 5.** Region plots for eye color, blue to brown

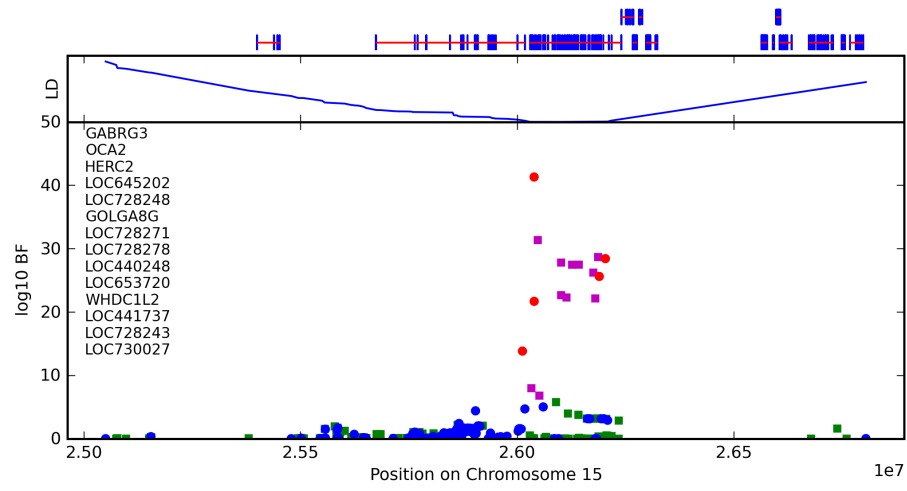

(a) Bayes factors around OCA2

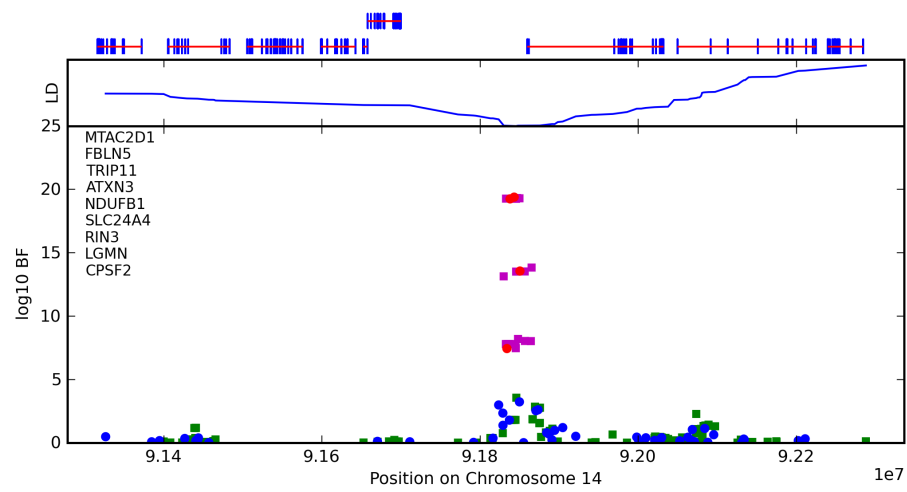

(b) Bayes factors around SLC24A4

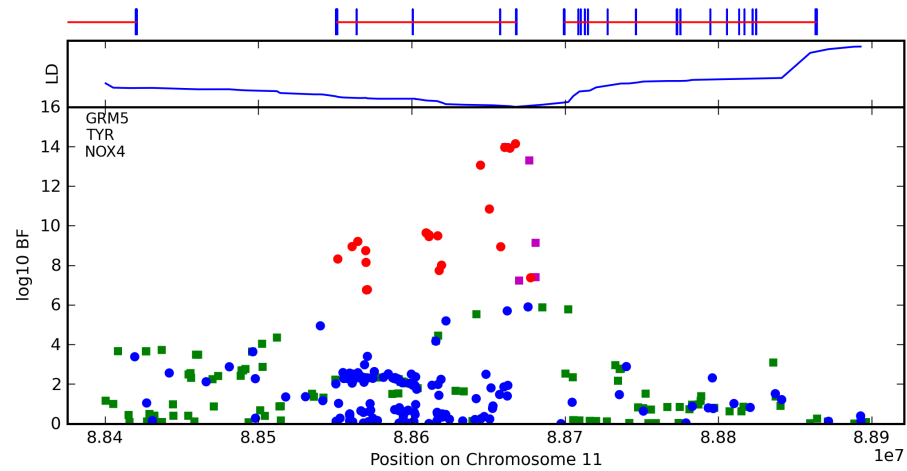

(c) Bayes factors around TYR

**Figure 6.** Region plots for eye color, blue versus green

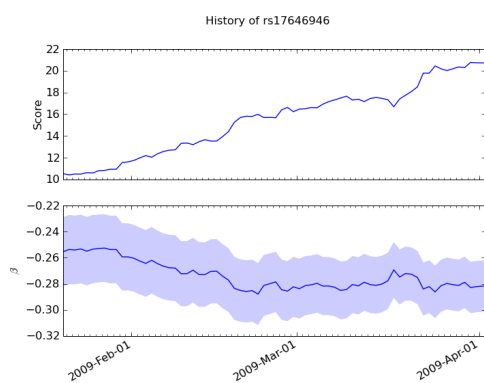

**Figure 7.** Association over time for rs17646946 and haircurl.

| SNP        | Chr | Position    | Locus            | Alleles | MAF  | Score | BF    | $\beta$ (95% CI)       | OR (95% CI) |
|------------|-----|-------------|------------------|---------|------|-------|-------|------------------------|-------------|
| rs17646946 | 1   | 150,329,391 | TCHH             | G/A     | 0.20 | 41.80 | 39.90 | -0.294 (-0.31 - -0.28) | —           |
| rs3007671  | 1   | 150,265,971 | NBPF18P S100A11  | G/T     | 0.26 | 27.22 | 24.89 | -0.215 (-0.24 - -0.19) | —           |
| rs7349332  | 2   | 219,464,627 | WNT10A           | C/T     | 0.14 | 13.48 | 11.01 | 0.193 (0.15 - 0.24)    | —           |
| rs4845779  | 1   | 150,745,800 | CRNN LCE5A       | C/T     | 0.31 | 10.03 | 7.67  | 0.124 (0.10 - 0.15)    | —           |
| rs499697   | 1   | 150,759,778 | CRC1 LCE3E       | A/G     | 0.29 | 9.95  | 7.61  | 0.126 (0.10 - 0.16)    | —           |
| rs3007684  | 1   | 150,301,054 | TCHH             | T/G     | 0.34 | 9.89  | 7.53  | 0.120 (0.10 - 0.14)    | —           |
| rs6723140  | 2   | 219,482,944 | WNT10A LOC391485 | T/C     | 0.18 | 8.79  | 6.54  | 0.140 (0.13 - 0.15)    | —           |
| rs10177996 | 2   | 219,454,805 | WNT10A           | T/C     | 0.19 | 8.45  | 6.23  | 0.133 (0.12 - 0.15)    | —           |
| rs4672907  | 2   | 219,529,413 | LOC391485        | G/A     | 0.17 | 8.24  | 6.05  | 0.136 (0.12 - 0.15)    | —           |
| rs1556547  | 6   | 10,378,363  | OFCC1            | A/G     | 0.40 | 7.81  | 5.61  | -0.101 (-0.12 - -0.08) | —           |
| rs11585118 | 1   | 17,478,361  | PAD3             | C/A     | 0.16 | 7.65  | 5.50  | -0.133 (-0.15 - -0.12) | —           |
| rs6587673  | 1   | 150,696,776 | CRNN LCE5A       | A/G     | 0.43 | 7.55  | 5.84  | 0.100 (0.08 - 0.12)    | —           |
| rs1333652  | 6   | 10,381,949  | OFCC1            | C/T     | 0.40 | 7.54  | 5.38  | -0.100 (-0.12 - -0.08) | —           |
| rs1556548  | 6   | 10,378,372  | OFCC1            | C/T     | 0.40 | 7.54  | 5.38  | -0.100 (-0.12 - -0.08) | —           |
| rs4240887  | 1   | 150,797,134 | CRC1 LCE3E       | G/A     | 0.37 | 7.50  | 5.50  | 0.100 (0.08 - 0.12)    | —           |
| rs6700998  | 1   | 150,700,633 | CRNN LCE5A       | G/T     | 0.43 | 7.48  | 5.75  | 0.099 (0.08 - 0.12)    | —           |
| rs1333657  | 6   | 10,404,322  | OFCC1            | C/T     | 0.37 | 7.42  | 5.39  | -0.100 (-0.12 - -0.08) | —           |
| rs12116609 | 1   | 150,764,309 | CRC1 LCE3E       | T/C     | 0.37 | 7.38  | 5.26  | 0.099 (0.08 - 0.12)    | —           |
| rs3753451  | 1   | 150,751,851 | LCE5A CRC1       | G/T     | 0.37 | 7.13  | 5.03  | 0.097 (0.07 - 0.12)    | —           |
| rs1053590  | 1   | 150,755,052 | CRC1             | C/T     | 0.37 | 7.09  | 5.00  | 0.097 (0.07 - 0.12)    | —           |
| rs2105117  | 1   | 150,750,753 | LCE5A            | A/G     | 0.38 | 7.01  | 4.97  | 0.097 (0.07 - 0.12)    | —           |

Table 3. All SNPs with scores over 7 for hair curl.

| SNP        | Chr | Position    | Locus | Alleles | MAF  | Score | BF    | $\beta$ (95% CI)       | OR (95% CI)         |
|------------|-----|-------------|-------|---------|------|-------|-------|------------------------|---------------------|
| rs4481887  | 1   | 246,563,486 | OR2M7 | G/A     | 0.26 | 23.18 | 21.74 | -0.514 (-0.62 - -0.41) | 0.598 (0.54 - 0.66) |
| rs4309013  | 1   | 246,547,391 | OR2M7 | T/C     | 0.27 | 22.27 | 20.78 | -0.496 (-0.60 - -0.40) | 0.609 (0.55 - 0.67) |
| rs4244187  | 1   | 246,560,134 | OR2M7 | C/T     | 0.27 | 22.02 | 20.44 | -0.493 (-0.59 - -0.39) | 0.611 (0.55 - 0.68) |
| rs7555310  | 1   | 246,554,261 | OR2M7 | G/A     | 0.27 | 21.72 | 20.18 | -0.489 (-0.59 - -0.39) | 0.613 (0.55 - 0.68) |
| rs6587440  | 1   | 246,482,285 | OR2M7 | G/A     | 0.27 | 19.85 | 18.36 | -0.463 (-0.56 - -0.36) | 0.629 (0.57 - 0.70) |
| rs7550630  | 1   | 246,428,934 | OR2M7 | T/C     | 0.23 | 14.69 | 12.29 | -0.415 (-0.52 - -0.31) | 0.660 (0.59 - 0.73) |
| rs4916113  | 1   | 246,443,915 | OR2M7 | T/C     | 0.23 | 14.51 | 12.18 | -0.409 (-0.51 - -0.31) | 0.664 (0.60 - 0.74) |
| rs7349159  | 1   | 246,452,865 | OR2M7 | T/C     | 0.25 | 13.22 | 11.15 | -0.378 (-0.48 - -0.28) | 0.686 (0.62 - 0.76) |
| rs4642918  | 1   | 246,477,680 | OR2M7 | T/G     | 0.25 | 13.12 | 11.15 | -0.377 (-0.48 - -0.28) | 0.686 (0.62 - 0.76) |
| rs10788759 | 1   | 246,417,399 | OR2M7 | G/A     | 0.35 | 8.75  | 6.63  | -0.274 (-0.36 - -0.18) | 0.760 (0.69 - 0.83) |
| rs9435891  | 1   | 246,411,221 | OR2M7 | C/T     | 0.35 | 8.71  | 6.60  | -0.274 (-0.36 - -0.18) | 0.760 (0.69 - 0.83) |
| rs1544175  | 1   | 246,590,885 | OR2M7 | A/G     | 0.47 | 8.10  | 5.99  | -0.257 (-0.34 - -0.17) | 0.773 (0.71 - 0.84) |
| rs4559542  | 1   | 246,556,603 | OR2M7 | T/C     | 0.46 | 7.75  | 6.96  | -0.244 (-0.33 - -0.16) | 0.783 (0.72 - 0.85) |

**Table 4.** All SNPs with scores over 7 for asparagus anosmia.

| SNP        | Chr | Position    | Locus  | Alleles | MAF  | Score | BF   | $\beta$ (95% CI)       | OR (95% CI)         |
|------------|-----|-------------|--------|---------|------|-------|------|------------------------|---------------------|
| rs10427255 | 2   | 145,841,993 | 2q22.3 | T/C     | 0.46 | 10.93 | 8.65 | 0.280 (0.20 - 0.36)    | 1.323 (1.22 - 1.43) |
| rs4422110  | 2   | 145,831,368 | 2q22.3 | T/C     | 0.47 | 10.58 | 8.24 | 0.275 (0.19 - 0.36)    | 1.316 (1.21 - 1.43) |
| rs6721116  | 2   | 145,872,667 | 2q22.3 | G/A     | 0.48 | 9.79  | 7.78 | 0.264 (0.18 - 0.34)    | 1.302 (1.20 - 1.41) |
| rs1040173  | 2   | 145,836,981 | 2q22.3 | C/T     | 0.46 | 8.54  | 6.18 | -0.246 (-0.33 - -0.16) | 0.782 (0.72 - 0.85) |
| rs1006134  | 2   | 145,852,089 | 2q22.3 | A/G     | 0.45 | 8.42  | 6.07 | -0.245 (-0.33 - -0.16) | 0.783 (0.72 - 0.85) |
| rs17410058 | 2   | 145,851,244 | 2q22.3 | T/C     | 0.31 | 7.99  | 5.78 | 0.252 (0.17 - 0.34)    | 1.286 (1.18 - 1.40) |
| rs11856995 | 15  | 94,126,647  | NR2F2  | T/C     | 0.30 | 7.13  | 5.71 | -0.244 (-0.33 - -0.15) | 0.784 (0.72 - 0.86) |

**Table 5.** All SNPs with scores over 7 for photic sneeze reflex.

| SNP        | Chr | Position   | Locus | Alleles | MAF  | Score | BF    | $\beta$ (95% CI)       | OR (95% CI) |
|------------|-----|------------|-------|---------|------|-------|-------|------------------------|-------------|
| rs12203592 | 6   | 341,321    | IRF4  | C/T     | 0.18 | 90.68 | 87.04 | 1.611 (1.48 - 1.74)    | —           |
| rs12931267 | 16  | 88,346,233 | MC1R  | C/G     | 0.08 | 61.08 | 60.89 | 1.875 (1.67 - 2.08)    | —           |
| rs258322   | 16  | 88,283,404 | MC1R  | G/A     | 0.10 | 44.31 | 44.28 | 1.446 (1.40 - 1.49)    | —           |
| rs4785763  | 16  | 88,594,437 | MC1R  | C/A     | 0.33 | 34.32 | 31.17 | 0.836 (0.78 - 0.89)    | —           |
| rs8049897  | 16  | 88,551,703 | MC1R  | G/A     | 0.15 | 29.79 | 27.76 | 1.033 (0.98 - 1.08)    | —           |
| rs4238833  | 16  | 88,578,190 | MC1R  | T/G     | 0.37 | 26.90 | 24.28 | 0.719 (0.66 - 0.78)    | —           |
| rs1805008  | 16  | 88,513,645 | MC1R  | C/T     | 0.07 | 23.18 | 21.05 | 1.212 (1.00 - 1.43)    | —           |
| rs4408545  | 16  | 88,571,529 | MC1R  | C/T     | 0.50 | 20.20 | 17.48 | -0.596 (-0.67 - -0.53) | —           |
| rs164741   | 16  | 88,219,799 | MC1R  | G/A     | 0.30 | 20.13 | 17.38 | 0.641 (0.58 - 0.70)    | —           |
| rs12210050 | 6   | 420,489    | IRF4  | C/T     | 0.18 | 18.58 | 15.87 | 0.712 (0.58 - 0.84)    | —           |
| rs1805009  | 16  | 88,514,047 | MC1R  | G/C     | 0.02 | 17.32 | 14.41 | 2.017 (1.97 - 2.06)    | —           |
| rs872071   | 6   | 356,064    | IRF4  | A/G     | 0.49 | 14.38 | 12.52 | 0.508 (0.44 - 0.58)    | —           |
| rs2353033  | 16  | 87,913,062 | MC1R  | T/C     | 0.43 | 13.41 | 11.09 | 0.481 (0.42 - 0.55)    | —           |
| rs619865   | 20  | 33,331,111 | ASIP  | G/A     | 0.10 | 13.26 | 10.78 | 0.771 (0.72 - 0.82)    | —           |
| rs1540771  | 6   | 411,033    | IRF4  | C/T     | 0.47 | 13.24 | 10.79 | 0.479 (0.41 - 0.55)    | —           |
| rs9378805  | 6   | 362,727    | IRF4  | A/C     | 0.49 | 12.91 | 10.79 | 0.481 (0.41 - 0.55)    | —           |
| rs11547464 | 16  | 88,513,592 | MC1R  | G/A     | 0.01 | 12.85 | 9.91  | 2.430 (2.38 - 2.48)    | —           |
| rs3778607  | 6   | 348,799    | IRF4  | G/A     | 0.47 | 12.67 | 10.65 | -0.471 (-0.54 - -0.40) | —           |
| rs7188458  | 16  | 88,253,985 | MC1R  | G/A     | 0.44 | 12.33 | 10.49 | 0.465 (0.40 - 0.53)    | —           |
| rs291671   | 20  | 31,414,506 | ASIP  | A/G     | 0.10 | 12.04 | 9.89  | 0.772 (0.58 - 0.96)    | —           |
| rs4959270  | 6   | 402,748    | IRF4  | C/A     | 0.50 | 11.93 | 9.53  | 0.451 (0.38 - 0.52)    | —           |
| rs352935   | 16  | 88,176,081 | MC1R  | T/C     | 0.48 | 11.71 | 9.37  | 0.450 (0.38 - 0.52)    | —           |
| rs7196459  | 16  | 88,668,978 | MC1R  | G/T     | 0.08 | 11.59 | 9.21  | 0.846 (0.63 - 1.07)    | —           |
| rs11861084 | 16  | 88,403,211 | MC1R  | C/A     | 0.41 | 11.27 | 8.90  | -0.445 (-0.51 - -0.38) | —           |
| rs2241039  | 16  | 88,615,938 | MC1R  | G/A     | 0.38 | 10.98 | 8.59  | -0.456 (-0.52 - -0.39) | —           |
| rs7204478  | 16  | 88,322,986 | MC1R  | C/T     | 0.45 | 10.61 | 8.40  | 0.427 (0.35 - 0.50)    | —           |
| rs6088316  | 20  | 31,890,503 | ASIP  | A/G     | 0.17 | 10.40 | 8.37  | 0.568 (0.43 - 0.71)    | —           |
| rs4911442  | 20  | 32,818,707 | ASIP  | A/G     | 0.12 | 10.24 | 7.98  | 0.629 (0.46 - 0.79)    | —           |
| rs464349   | 16  | 88,183,752 | MC1R  | C/T     | 0.48 | 10.20 | 7.89  | -0.412 (-0.49 - -0.34) | —           |
| rs7195066  | 16  | 88,363,824 | MC1R  | C/T     | 0.32 | 10.12 | 7.76  | -0.449 (-0.55 - -0.35) | —           |
| rs761238   | 20  | 31,983,649 | ASIP  | T/G     | 0.33 | 9.90  | 7.56  | 0.428 (0.37 - 0.49)    | —           |
| rs1800286  | 16  | 88,397,262 | MC1R  | C/T     | 0.41 | 9.85  | 7.62  | -0.413 (-0.50 - -0.33) | —           |
| rs17305657 | 20  | 31,270,249 | ASIP  | T/C     | 0.09 | 9.82  | 7.56  | 0.697 (0.65 - 0.74)    | —           |
| rs4812405  | 20  | 34,709,999 | ASIP  | C/A     | 0.07 | 9.70  | 7.40  | 0.783 (0.74 - 0.83)    | —           |
| rs1474976  | 20  | 34,195,786 | ASIP  | A/C     | 0.11 | 9.50  | 7.23  | 0.620 (0.45 - 0.79)    | —           |
| rs2153271  | 9   | 16,854,521 | BNC2  | T/C     | 0.41 | 9.40  | 7.28  | -0.402 (-0.47 - -0.34) | —           |
| rs9328192  | 6   | 379,364    | IRF4  | A/G     | 0.50 | 9.39  | 7.11  | 0.395 (0.32 - 0.47)    | —           |
| rs2284378  | 20  | 32,051,756 | ASIP  | C/T     | 0.33 | 9.22  | 6.93  | 0.415 (0.32 - 0.51)    | —           |
| rs6060612  | 20  | 33,853,941 | ASIP  | G/A     | 0.10 | 9.20  | 6.95  | 0.640 (0.59 - 0.69)    | —           |
| rs2268089  | 20  | 32,130,959 | ASIP  | C/T     | 0.33 | 9.08  | 6.79  | 0.411 (0.32 - 0.50)    | —           |
| rs1800359  | 16  | 88,332,762 | MC1R  | G/A     | 0.41 | 9.04  | 6.87  | -0.394 (-0.46 - -0.33) | —           |
| rs11648785 | 16  | 88,612,062 | MC1R  | C/T     | 0.31 | 8.96  | 6.70  | -0.424 (-0.52 - -0.33) | —           |
| rs4911379  | 20  | 31,998,966 | ASIP  | C/A     | 0.33 | 8.93  | 6.67  | 0.406 (0.35 - 0.46)    | —           |
| rs8060934  | 16  | 88,447,526 | MC1R  | T/C     | 0.48 | 8.86  | 6.60  | -0.390 (-0.46 - -0.32) | —           |
| rs9405675  | 6   | 389,600    | IRF4  | A/G     | 0.36 | 8.72  | 6.86  | -0.392 (-0.48 - -0.30) | —           |
| rs154659   | 16  | 88,194,838 | MC1R  | T/C     | 0.25 | 8.62  | 6.45  | 0.433 (0.38 - 0.49)    | —           |
| rs463701   | 16  | 88,126,261 | MC1R  | A/G     | 0.45 | 8.53  | 6.41  | -0.380 (-0.46 - -0.30) | —           |
| rs4911414  | 20  | 32,193,105 | ASIP  | G/T     | 0.34 | 8.52  | 6.26  | 0.393 (0.30 - 0.48)    | —           |
| rs12599531 | 16  | 88,436,902 | MC1R  | C/T     | 0.37 | 8.32  | 6.15  | -0.387 (-0.47 - -0.30) | —           |
| rs382745   | 16  | 88,131,087 | MC1R  | A/G     | 0.44 | 8.28  | 6.16  | -0.372 (-0.45 - -0.29) | —           |
| rs17396317 | 20  | 31,254,038 | ASIP  | G/A     | 0.12 | 7.99  | 5.80  | 0.544 (0.49 - 0.59)    | —           |
| rs950286   | 6   | 374,457    | IRF4  | G/A     | 0.10 | 7.40  | 5.30  | -0.558 (-0.61 - -0.51) | —           |
| rs1339548  | 9   | 16,836,323 | BNC2  | T/C     | 0.33 | 7.39  | 5.66  | -0.367 (-0.43 - -0.31) | —           |
| rs9405681  | 6   | 394,358    | IRF4  | C/T     | 0.23 | 7.34  | 5.21  | -0.406 (-0.52 - -0.29) | —           |
| rs2268086  | 20  | 32,112,399 | ASIP  | G/A     | 0.39 | 7.25  | 5.07  | 0.349 (0.29 - 0.41)    | —           |
| rs1042602  | 11  | 88,551,344 | TYR   | C/A     | 0.37 | 7.23  | 5.48  | -0.355 (-0.42 - -0.29) | —           |
| rs4911145  | 20  | 32,078,884 | ASIP  | G/A     | 0.39 | 7.22  | 5.05  | 0.348 (0.28 - 0.41)    | —           |
| rs2424994  | 20  | 32,596,578 | ASIP  | C/T     | 0.17 | 7.22  | 5.32  | 0.461 (0.32 - 0.60)    | —           |
| rs9503644  | 6   | 360,406    | IRF4  | G/A     | 0.14 | 7.11  | 4.99  | -0.484 (-0.53 - -0.43) | —           |
| rs6060891  | 20  | 34,338,559 | ASIP  | C/T     | 0.28 | 7.01  | 4.98  | 0.372 (0.27 - 0.47)    | —           |

Table 6. All SNPs with scores over 7 for freckling.

| SNP        | Chr | Position   | Locus      | Alleles | MAF  | Score | BF    | $\beta$ (95% CI)       | OR (95% CI) |
|------------|-----|------------|------------|---------|------|-------|-------|------------------------|-------------|
| rs12913832 | 15  | 26,039,213 | OCA2/HERC2 | G/A     | 0.23 | 87.07 | 85.76 | 0.974 (0.94 - 1.01)    | —           |
| rs1667394  | 15  | 26,203,777 | OCA2/HERC2 | T/C     | 0.16 | 48.55 | 45.83 | 0.854 (0.82 - 0.89)    | —           |
| rs8039195  | 15  | 26,189,679 | OCA2/HERC2 | T/C     | 0.14 | 40.89 | 38.40 | 0.834 (0.80 - 0.87)    | —           |
| rs4778241  | 15  | 26,012,308 | OCA2/HERC2 | C/A     | 0.17 | 29.87 | 27.09 | 0.638 (0.60 - 0.67)    | —           |
| rs12203592 | 6   | 341,321    | IRF4       | C/T     | 0.18 | 27.64 | 27.17 | 0.589 (0.50 - 0.68)    | —           |
| rs7183877  | 15  | 26,039,328 | OCA2/HERC2 | C/A     | 0.08 | 21.15 | 18.47 | 0.759 (0.73 - 0.79)    | —           |
| rs16891982 | 5   | 33,987,450 | SLC45A2    | G/C     | 0.03 | 19.41 | 16.76 | 1.104 (1.07 - 1.13)    | —           |
| rs16950987 | 15  | 26,199,823 | OCA2/HERC2 | G/A     | 0.05 | 15.41 | 12.81 | 0.764 (0.73 - 0.80)    | —           |
| rs7495174  | 15  | 26,017,833 | OCA2/HERC2 | A/G     | 0.06 | 15.20 | 12.56 | 0.711 (0.55 - 0.87)    | —           |
| rs8028689  | 15  | 26,162,483 | OCA2/HERC2 | T/C     | 0.05 | 14.87 | 12.28 | 0.753 (0.72 - 0.78)    | —           |
| rs35391    | 5   | 33,991,430 | SLC45A2    | C/T     | 0.02 | 14.62 | 11.84 | 1.128 (0.86 - 1.40)    | —           |
| rs11636232 | 15  | 26,060,221 | OCA2/HERC2 | C/T     | 0.40 | 14.53 | 12.04 | -0.340 (-0.40 - -0.28) | —           |
| rs4778138  | 15  | 26,009,415 | OCA2/HERC2 | A/G     | 0.12 | 14.40 | 11.83 | 0.510 (0.40 - 0.62)    | —           |
| rs16950979 | 15  | 26,194,101 | OCA2/HERC2 | A/G     | 0.05 | 14.25 | 11.69 | 0.743 (0.57 - 0.92)    | —           |
| rs2240204  | 15  | 26,167,627 | OCA2/HERC2 | G/A     | 0.05 | 14.25 | 11.69 | 0.743 (0.71 - 0.77)    | —           |
| rs35390    | 5   | 33,991,083 | SLC45A2    | A/C     | 0.02 | 13.78 | 11.05 | 1.104 (0.83 - 1.38)    | —           |
| rs12896399 | 14  | 91,843,416 | SLC24A4    | G/T     | 0.44 | 12.34 | 9.83  | -0.308 (-0.36 - -0.26) | —           |
| rs4904866  | 14  | 91,838,256 | SLC24A4    | C/T     | 0.44 | 12.15 | 9.65  | -0.306 (-0.36 - -0.25) | —           |
| rs35408    | 5   | 34,000,695 | SLC45A2    | T/C     | 0.02 | 11.19 | 8.63  | 0.964 (0.93 - 0.99)    | —           |
| rs35412    | 5   | 34,002,902 | SLC45A2    | G/C     | 0.02 | 11.19 | 8.63  | 0.964 (0.93 - 0.99)    | —           |
| rs7174027  | 15  | 26,002,360 | OCA2/HERC2 | G/A     | 0.09 | 10.07 | 7.72  | 0.474 (0.44 - 0.51)    | —           |
| rs35394    | 5   | 33,984,076 | SLC45A2    | T/C     | 0.02 | 9.85  | 7.32  | 1.027 (1.00 - 1.06)    | —           |
| rs35398    | 5   | 33,987,583 | SLC45A2    | G/T     | 0.02 | 9.85  | 7.32  | 1.027 (0.72 - 1.33)    | —           |
| rs40132    | 5   | 33,986,460 | SLC45A2    | A/G     | 0.02 | 9.65  | 7.13  | 1.020 (0.71 - 1.33)    | —           |
| rs12931267 | 16  | 88,346,233 | MC1R       | C/G     | 0.08 | 9.48  | 7.33  | -0.556 (-0.72 - -0.39) | —           |
| rs4778211  | 15  | 25,872,900 | OCA2/HERC2 | C/A     | 0.16 | 8.14  | 5.95  | 0.342 (0.31 - 0.38)    | —           |
| rs12210050 | 6   | 420,489    | IRF4       | C/T     | 0.18 | 8.14  | 5.95  | 0.309 (0.22 - 0.39)    | —           |
| rs4904868  | 14  | 91,850,754 | SLC24A4    | C/T     | 0.45 | 7.89  | 5.68  | 0.245 (0.19 - 0.30)    | —           |
| rs26722    | 5   | 33,999,627 | SLC45A2    | C/T     | 0.02 | 7.75  | 5.41  | 0.873 (0.58 - 1.17)    | —           |
| rs17128162 | 14  | 91,850,110 | SLC24A4    | G/A     | 0.11 | 7.51  | 5.44  | -0.378 (-0.41 - -0.35) | —           |
| rs4904864  | 14  | 91,834,272 | SLC24A4    | G/A     | 0.35 | 7.48  | 5.32  | 0.250 (0.21 - 0.29)    | —           |
| rs6918152  | 6   | 487,159    | LOC730077  | G/A     | 0.38 | 7.07  | 4.91  | -0.240 (-0.28 - -0.20) | —           |
| rs9392056  | 6   | 463,078    | EXOC2      | A/G     | 0.38 | 7.03  | 4.87  | -0.238 (-0.30 - -0.18) | —           |

**Table 7.** All SNPs with scores over 7 for haircolor.



| SNP        | Chr | Position   | Locus | Alleles | MAF  | Score | BF    | $\beta$ (95% CI)       | OR (95% CI) |
|------------|-----|------------|-------|---------|------|-------|-------|------------------------|-------------|
| rs12931267 | 16  | 88,346,233 | MC1R  | C/G     | 0.08 | 86.28 | 89.80 | 0.556 (0.51 - 0.61)    | —           |
| rs258322   | 16  | 88,283,404 | MC1R  | G/A     | 0.10 | 56.77 | 57.53 | 0.410 (0.40 - 0.42)    | —           |
| rs4785763  | 16  | 88,594,437 | MC1R  | C/A     | 0.33 | 49.68 | 48.61 | 0.252 (0.24 - 0.27)    | —           |
| rs4238833  | 16  | 88,578,190 | MC1R  | T/G     | 0.37 | 42.77 | 41.02 | 0.228 (0.21 - 0.24)    | —           |
| rs8049897  | 16  | 88,551,703 | MC1R  | G/A     | 0.15 | 42.38 | 40.65 | 0.309 (0.30 - 0.32)    | —           |
| rs1805008  | 16  | 88,513,645 | MC1R  | C/T     | 0.07 | 37.48 | 36.19 | 0.387 (0.33 - 0.44)    | —           |
| rs164741   | 16  | 88,219,799 | MC1R  | G/A     | 0.30 | 34.29 | 32.12 | 0.211 (0.20 - 0.23)    | —           |
| rs4408545  | 16  | 88,571,529 | MC1R  | C/T     | 0.50 | 24.23 | 22.14 | -0.164 (-0.18 - -0.15) | —           |
| rs7204478  | 16  | 88,322,986 | MC1R  | C/T     | 0.45 | 21.90 | 20.79 | 0.157 (0.14 - 0.18)    | —           |
| rs7188458  | 16  | 88,253,985 | MC1R  | G/A     | 0.44 | 20.14 | 17.91 | 0.151 (0.13 - 0.17)    | —           |
| rs11861084 | 16  | 88,403,211 | MC1R  | C/A     | 0.41 | 19.09 | 16.35 | -0.147 (-0.16 - -0.13) | —           |
| rs1800286  | 16  | 88,397,262 | MC1R  | C/T     | 0.41 | 18.63 | 15.96 | -0.145 (-0.17 - -0.12) | —           |
| rs1800359  | 16  | 88,332,762 | MC1R  | G/A     | 0.41 | 17.90 | 15.21 | -0.142 (-0.16 - -0.13) | —           |
| rs1805009  | 16  | 88,514,047 | MC1R  | G/C     | 0.02 | 17.43 | 14.48 | 0.508 (0.50 - 0.52)    | —           |
| rs352935   | 16  | 88,176,081 | MC1R  | T/C     | 0.48 | 17.37 | 15.66 | 0.139 (0.12 - 0.16)    | —           |
| rs8060934  | 16  | 88,447,526 | MC1R  | T/C     | 0.48 | 16.24 | 14.43 | -0.135 (-0.15 - -0.12) | —           |
| rs2241039  | 16  | 88,615,938 | MC1R  | G/A     | 0.38 | 15.39 | 12.92 | -0.137 (-0.15 - -0.12) | —           |
| rs291671   | 20  | 31,414,506 | ASIP  | A/G     | 0.10 | 14.70 | 12.45 | 0.215 (0.17 - 0.26)    | —           |
| rs12599531 | 16  | 88,436,902 | MC1R  | C/T     | 0.37 | 14.15 | 11.76 | -0.129 (-0.15 - -0.11) | —           |
| rs2353033  | 16  | 87,913,062 | MC1R  | T/C     | 0.43 | 13.93 | 11.55 | 0.123 (0.11 - 0.14)    | —           |
| rs2159116  | 16  | 88,359,011 | MC1R  | C/A     | 0.17 | 12.58 | 10.37 | 0.157 (0.14 - 0.17)    | —           |
| rs8058895  | 16  | 88,342,308 | MC1R  | T/C     | 0.17 | 12.56 | 10.38 | 0.157 (0.14 - 0.17)    | —           |
| rs17305657 | 20  | 31,270,249 | ASIP  | T/C     | 0.09 | 12.31 | 9.89  | 0.197 (0.19 - 0.21)    | —           |
| rs460879   | 16  | 88,240,390 | MC1R  | C/T     | 0.46 | 11.77 | 9.38  | -0.113 (-0.13 - -0.09) | —           |
| rs7196459  | 16  | 88,668,978 | MC1R  | G/T     | 0.08 | 11.31 | 8.94  | 0.208 (0.15 - 0.26)    | —           |
| rs7195066  | 16  | 88,363,824 | MC1R  | C/T     | 0.32 | 11.10 | 8.69  | -0.118 (-0.14 - -0.09) | —           |
| rs459920   | 16  | 88,258,328 | MC1R  | T/C     | 0.45 | 10.77 | 8.35  | -0.108 (-0.12 - -0.09) | —           |
| rs464349   | 16  | 88,183,752 | MC1R  | C/T     | 0.48 | 10.75 | 8.32  | -0.106 (-0.12 - -0.09) | —           |
| rs619865   | 20  | 33,331,111 | ASIP  | G/A     | 0.10 | 9.89  | 7.59  | 0.165 (0.15 - 0.18)    | —           |
| rs9936896  | 16  | 88,596,560 | MC1R  | T/C     | 0.20 | 9.87  | 7.59  | 0.129 (0.12 - 0.14)    | —           |
| rs447735   | 16  | 88,261,850 | MC1R  | T/C     | 0.44 | 9.85  | 7.49  | -0.103 (-0.12 - -0.09) | —           |
| rs2306633  | 16  | 87,882,779 | MC1R  | G/A     | 0.26 | 9.10  | 6.84  | -0.112 (-0.13 - -0.10) | —           |
| rs17396317 | 20  | 31,254,038 | ASIP  | G/A     | 0.12 | 9.00  | 6.90  | 0.145 (0.13 - 0.16)    | —           |
| rs6500437  | 16  | 88,317,399 | MC1R  | T/C     | 0.30 | 8.58  | 6.71  | 0.105 (0.09 - 0.12)    | —           |
| rs11648785 | 16  | 88,612,062 | MC1R  | C/T     | 0.31 | 8.47  | 6.21  | -0.103 (-0.13 - -0.08) | —           |
| rs4347628  | 16  | 88,098,136 | MC1R  | C/T     | 0.44 | 8.42  | 6.28  | -0.095 (-0.11 - -0.07) | —           |
| rs2016571  | 16  | 88,371,777 | MC1R  | G/C     | 0.31 | 8.20  | 6.15  | 0.102 (0.09 - 0.12)    | —           |
| rs463701   | 16  | 88,126,261 | MC1R  | A/G     | 0.45 | 8.07  | 6.02  | -0.092 (-0.11 - -0.07) | —           |
| rs1061646  | 16  | 88,333,478 | MC1R  | G/A     | 0.31 | 8.04  | 6.13  | 0.100 (0.09 - 0.11)    | —           |
| rs3785275  | 16  | 88,369,530 | MC1R  | C/G     | 0.31 | 7.87  | 5.88  | 0.099 (0.07 - 0.12)    | —           |
| rs382745   | 16  | 88,131,087 | MC1R  | A/G     | 0.44 | 7.86  | 5.82  | -0.091 (-0.11 - -0.07) | —           |
| rs16966142 | 16  | 88,378,534 | MC1R  | C/T     | 0.09 | 7.85  | 5.71  | -0.168 (-0.22 - -0.11) | —           |
| rs2378249  | 20  | 32,681,751 | ASIP  | A/G     | 0.16 | 7.77  | 5.62  | 0.121 (0.09 - 0.16)    | —           |
| rs2378199  | 20  | 32,650,141 | ASIP  | C/T     | 0.16 | 7.71  | 5.56  | 0.121 (0.09 - 0.16)    | —           |
| rs4812405  | 20  | 34,709,999 | ASIP  | C/A     | 0.07 | 7.42  | 5.47  | 0.170 (0.16 - 0.18)    | —           |
| rs7189734  | 16  | 88,328,051 | MC1R  | G/A     | 0.25 | 7.39  | 5.36  | 0.101 (0.09 - 0.12)    | —           |
| rs1800345  | 16  | 88,342,718 | MC1R  | C/T     | 0.31 | 7.34  | 5.30  | 0.096 (0.07 - 0.12)    | —           |
| rs4911442  | 20  | 32,818,707 | ASIP  | A/G     | 0.12 | 7.23  | 5.27  | 0.131 (0.09 - 0.17)    | —           |
| rs7361656  | 20  | 33,192,808 | ASIP  | T/G     | 0.24 | 7.11  | 5.52  | 0.099 (0.09 - 0.11)    | —           |
| rs6500452  | 16  | 88,386,006 | MC1R  | T/C     | 0.31 | 7.02  | 4.96  | 0.094 (0.08 - 0.11)    | —           |

**Table 8.** All SNPs with scores over 7 for red hair.

| SNP        | Chr | Position   | Locus          | Alleles | MAF  | Score  | BF     | $\beta$ (95% CI)       | OR (95% CI) |
|------------|-----|------------|----------------|---------|------|--------|--------|------------------------|-------------|
| rs12913832 | 15  | 26,039,213 | OCA2/HERC2     | G/A     | 0.23 | > 300  | > 300  | 2.491 (2.47 - 2.51)    | —           |
| rs1667394  | 15  | 26,203,777 | OCA2/HERC2     | T/C     | 0.16 | > 300  | > 300  | 2.176 (2.15 - 2.20)    | —           |
| rs8039195  | 15  | 26,189,679 | OCA2/HERC2     | T/C     | 0.14 | 291.35 | 293.35 | 2.088 (2.06 - 2.12)    | —           |
| rs4778241  | 15  | 26,012,308 | OCA2/HERC2     | C/A     | 0.17 | 232.34 | 230.88 | 1.692 (1.66 - 1.72)    | —           |
| rs4778138  | 15  | 26,009,415 | OCA2/HERC2     | A/G     | 0.12 | 135.65 | 131.98 | 1.529 (1.43 - 1.63)    | —           |
| rs16950987 | 15  | 26,199,823 | OCA2/HERC2     | G/A     | 0.05 | 125.44 | 121.47 | 2.169 (2.14 - 2.20)    | —           |
| rs7495174  | 15  | 26,017,833 | OCA2/HERC2     | A/G     | 0.06 | 124.09 | 120.23 | 2.032 (1.88 - 2.18)    | —           |
| rs8028689  | 15  | 26,162,483 | OCA2/HERC2     | T/C     | 0.05 | 122.42 | 118.46 | 2.156 (2.13 - 2.18)    | —           |
| rs7188877  | 15  | 26,039,328 | OCA2/HERC2     | C/A     | 0.08 | 120.28 | 116.87 | 1.759 (1.73 - 1.79)    | —           |
| rs2240204  | 15  | 26,167,627 | OCA2/HERC2     | G/A     | 0.05 | 117.51 | 113.57 | 2.127 (2.10 - 2.16)    | —           |
| rs16950979 | 15  | 26,194,101 | OCA2/HERC2     | A/G     | 0.05 | 117.42 | 113.48 | 2.127 (1.96 - 2.29)    | —           |
| rs11636232 | 15  | 26,060,221 | OCA2/HERC2     | C/T     | 0.40 | 115.29 | 113.62 | -0.936 (-0.99 - -0.89) | —           |
| rs7174027  | 15  | 26,002,360 | OCA2/HERC2     | G/A     | 0.09 | 96.16  | 92.37  | 1.471 (1.44 - 1.50)    | —           |
| rs6497253  | 15  | 25,962,144 | OCA2/HERC2     | G/A     | 0.21 | 43.47  | 40.32  | 0.710 (0.68 - 0.74)    | —           |
| rs1470608  | 15  | 25,961,716 | OCA2/HERC2     | G/T     | 0.14 | 42.49  | 39.33  | 0.839 (0.74 - 0.94)    | —           |
| rs7170869  | 15  | 25,962,343 | OCA2/HERC2     | A/G     | 0.14 | 42.01  | 38.89  | 0.836 (0.73 - 0.94)    | —           |
| rs4778232  | 15  | 25,955,360 | OCA2/HERC2     | C/T     | 0.21 | 38.75  | 35.90  | 0.663 (0.58 - 0.74)    | —           |
| rs749846   | 15  | 25,942,585 | OCA2/HERC2     | C/A     | 0.14 | 34.53  | 31.70  | 0.772 (0.74 - 0.81)    | —           |
| rs1448485  | 15  | 25,956,336 | OCA2/HERC2     | G/T     | 0.12 | 33.58  | 30.51  | 0.785 (0.67 - 0.90)    | —           |
| rs1597196  | 15  | 25,968,517 | OCA2/HERC2     | G/T     | 0.17 | 31.88  | 28.81  | 0.648 (0.56 - 0.74)    | —           |
| rs8024968  | 15  | 25,957,284 | OCA2/HERC2     | C/T     | 0.10 | 30.02  | 27.01  | 0.802 (0.68 - 0.92)    | —           |
| rs16950821 | 15  | 25,957,102 | OCA2/HERC2     | G/A     | 0.10 | 29.69  | 26.69  | 0.797 (0.77 - 0.83)    | —           |
| rs7179994  | 15  | 25,997,365 | OCA2/HERC2     | A/G     | 0.13 | 28.05  | 25.07  | 0.669 (0.57 - 0.77)    | —           |
| rs4778211  | 15  | 25,872,900 | OCA2/HERC2     | C/A     | 0.16 | 27.02  | 24.36  | 0.628 (0.60 - 0.66)    | —           |
| rs7170451  | 15  | 25,865,819 | OCA2/HERC2     | G/A     | 0.27 | 26.48  | 23.52  | 0.503 (0.47 - 0.54)    | —           |
| rs1800407  | 15  | 25,903,913 | OCA2/HERC2     | C/T     | 0.08 | 23.49  | 20.78  | 0.823 (0.68 - 0.97)    | —           |
| rs3794604  | 15  | 25,945,660 | OCA2/HERC2     | C/T     | 0.10 | 23.37  | 20.52  | 0.699 (0.58 - 0.82)    | —           |
| rs1448488  | 15  | 25,890,452 | OCA2/HERC2     | T/C     | 0.28 | 23.16  | 20.33  | 0.465 (0.43 - 0.50)    | —           |
| rs1800411  | 15  | 25,885,516 | OCA2/HERC2     | A/G     | 0.28 | 22.98  | 20.15  | 0.464 (0.40 - 0.53)    | —           |
| rs12910433 | 15  | 25,902,239 | OCA2/HERC2     | A/G     | 0.29 | 22.40  | 19.61  | 0.456 (0.39 - 0.52)    | —           |
| rs1900758  | 15  | 25,903,692 | OCA2/HERC2     | T/C     | 0.29 | 22.29  | 19.54  | 0.464 (0.43 - 0.50)    | —           |
| rs4778220  | 15  | 25,894,733 | OCA2/HERC2     | A/G     | 0.17 | 20.58  | 17.83  | 0.531 (0.44 - 0.62)    | —           |
| rs728405   | 15  | 25,873,448 | OCA2/HERC2     | A/C     | 0.22 | 19.91  | 17.34  | 0.466 (0.39 - 0.54)    | —           |
| rs1037208  | 15  | 25,904,952 | OCA2/HERC2     | T/G     | 0.17 | 19.90  | 17.16  | 0.516 (0.48 - 0.55)    | —           |
| rs11635884 | 15  | 26,042,564 | OCA2/HERC2     | T/C     | 0.01 | 19.30  | 15.10  | 2.635 (2.61 - 2.66)    | —           |
| rs2594935  | 15  | 25,858,633 | OCA2/HERC2     | G/A     | 0.29 | 19.23  | 16.47  | 0.417 (0.38 - 0.45)    | —           |
| rs2703952  | 15  | 25,855,576 | OCA2/HERC2     | T/G     | 0.16 | 17.06  | 14.68  | 0.495 (0.46 - 0.53)    | —           |
| rs12896399 | 14  | 91,843,416 | SLC24A4        | G/T     | 0.44 | 15.95  | 13.49  | -0.343 (-0.39 - -0.29) | —           |
| rs4904866  | 14  | 91,838,256 | SLC24A4        | C/T     | 0.44 | 15.81  | 13.35  | -0.342 (-0.39 - -0.29) | —           |
| rs12203592 | 6   | 341,321    | IRF4           | C/T     | 0.18 | 14.69  | 13.26  | -0.424 (-0.51 - -0.34) | —           |
| rs1800404  | 15  | 25,909,368 | OCA2/HERC2     | T/C     | 0.21 | 14.47  | 11.91  | 0.411 (0.38 - 0.44)    | —           |
| rs7178315  | 15  | 25,911,504 | OCA2/HERC2     | C/T     | 0.21 | 14.20  | 11.64  | 0.407 (0.32 - 0.49)    | —           |
| rs977589   | 15  | 25,853,198 | OCA2/HERC2     | C/T     | 0.47 | 13.76  | 11.19  | -0.322 (-0.37 - -0.27) | —           |
| rs4904868  | 14  | 91,850,754 | SLC24A4        | C/T     | 0.45 | 13.49  | 10.95  | 0.317 (0.27 - 0.37)    | —           |
| rs2871875  | 15  | 25,938,449 | OCA2/HERC2     | G/A     | 0.24 | 12.57  | 10.14  | 0.361 (0.33 - 0.40)    | —           |
| rs16891982 | 5   | 33,987,450 | SLC45A2        | G/C     | 0.03 | 11.83  | 9.42   | 0.840 (0.81 - 0.87)    | —           |
| rs1107267  | 15  | 25,645,234 | OCA2/HERC2     | G/A     | 0.26 | 11.76  | 10.33  | 0.338 (0.30 - 0.37)    | —           |
| rs3930739  | 15  | 25,713,937 | OCA2/HERC2     | C/T     | 0.46 | 11.38  | 8.96   | -0.288 (-0.34 - -0.24) | —           |
| rs17565953 | 15  | 25,692,250 | OCA2/HERC2     | G/T     | 0.40 | 10.94  | 8.68   | -0.289 (-0.34 - -0.23) | —           |
| rs8036718  | 15  | 25,727,152 | OCA2/HERC2     | G/A     | 0.38 | 10.63  | 8.39   | -0.284 (-0.32 - -0.24) | —           |
| rs6497238  | 15  | 25,727,373 | OCA2/HERC2     | T/C     | 0.38 | 10.43  | 8.18   | -0.281 (-0.32 - -0.24) | —           |
| rs7496968  | 15  | 25,984,569 | OCA2/HERC2     | A/G     | 0.11 | 9.88   | 8.09   | 0.430 (0.31 - 0.55)    | —           |
| rs11631195 | 15  | 25,695,483 | OCA2/HERC2     | G/A     | 0.37 | 9.27   | 7.05   | -0.266 (-0.31 - -0.23) | —           |
| rs4904864  | 14  | 91,834,272 | SLC24A4        | G/A     | 0.35 | 9.17   | 6.90   | 0.272 (0.23 - 0.31)    | —           |
| rs13329466 | 15  | 25,950,357 | OCA2/HERC2     | G/A     | 0.23 | 9.10   | 6.91   | -0.301 (-0.34 - -0.27) | —           |
| rs4778192  | 15  | 25,753,656 | OCA2/HERC2     | T/C     | 0.47 | 8.66   | 6.39   | -0.248 (-0.29 - -0.20) | —           |
| rs977588   | 15  | 25,852,901 | OCA2/HERC2     | A/C     | 0.41 | 8.55   | 6.48   | 0.252 (0.20 - 0.31)    | —           |
| rs1393350  | 11  | 88,650,694 | TYR            | G/A     | 0.27 | 8.49   | 6.25   | -0.278 (-0.32 - -0.24) | —           |
| rs438702   | 15  | 26,798,209 | OCA2/HERC2     | T/C     | 0.40 | 8.49   | 6.22   | 0.255 (0.21 - 0.30)    | —           |
| rs4778189  | 15  | 25,745,823 | OCA2/HERC2     | G/A     | 0.47 | 8.43   | 6.21   | -0.245 (-0.29 - -0.20) | —           |
| rs2311469  | 15  | 25,742,663 | OCA2/HERC2     | G/T     | 0.47 | 8.35   | 6.12   | -0.243 (-0.29 - -0.19) | —           |
| rs35391    | 5   | 33,991,430 | SLC45A2        | C/T     | 0.02 | 8.08   | 5.78   | 0.814 (0.54 - 1.08)    | —           |
| rs8035334  | 15  | 25,753,962 | OCA2/HERC2     | G/A     | 0.48 | 8.02   | 5.95   | -0.239 (-0.29 - -0.19) | —           |
| rs35390    | 5   | 33,991,083 | SLC45A2        | A/C     | 0.02 | 7.86   | 5.58   | 0.811 (0.54 - 1.08)    | —           |
| rs1847134  | 11  | 88,644,901 | TYR            | A/C     | 0.32 | 7.57   | 5.40   | -0.249 (-0.31 - -0.19) | —           |
| rs10960751 | 9   | 12,665,264 | TYRP1          | C/T     | 0.37 | 7.54   | 5.35   | 0.240 (0.18 - 0.30)    | —           |
| rs1408799  | 9   | 12,662,097 | TYRP1          | C/T     | 0.31 | 7.42   | 5.39   | 0.251 (0.19 - 0.32)    | —           |
| rs2594909  | 15  | 25,824,657 | OCA2/HERC2     | T/C     | 0.41 | 7.27   | 5.10   | -0.231 (-0.27 - -0.19) | —           |
| rs35408    | 5   | 34,000,695 | SLC45A2        | T/C     | 0.02 | 7.27   | 5.06   | 0.765 (0.73 - 0.80)    | —           |
| rs35412    | 5   | 34,002,902 | SLC45A2        | G/C     | 0.02 | 7.12   | 4.92   | 0.756 (0.73 - 0.79)    | —           |
| rs1137134  | 9   | 12,702,157 | TYRP1 C9orf150 | A/G     | 0.40 | 7.10   | 4.94   | 0.228 (0.17 - 0.28)    | —           |
| rs2703936  | 15  | 25,831,670 | OCA2/HERC2     | A/C     | 0.41 | 7.06   | 4.91   | -0.228 (-0.28 - -0.17) | —           |

Table 9. All SNPs with scores over 7 for eye color.

| SNP        | Chr | Position   | Locus      | Alleles | MAF  | Score | BF    | $\beta$ (95% CI)       | OR (95% CI)          |
|------------|-----|------------|------------|---------|------|-------|-------|------------------------|----------------------|
| rs12913832 | 15  | 26,039,213 | OCA2/HERC2 | G/A     | 0.23 | 51.52 | 41.34 | 2.131 (1.79 - 2.47)    | 8.425 (5.99 - 11.84) |
| rs1667394  | 15  | 26,203,777 | OCA2/HERC2 | T/C     | 0.16 | 36.09 | 28.45 | 1.944 (1.58 - 2.31)    | 6.985 (4.85 - 10.06) |
| rs8039195  | 15  | 26,189,679 | OCA2/HERC2 | T/C     | 0.14 | 32.86 | 25.63 | 1.910 (1.54 - 2.29)    | 6.753 (4.64 - 9.83)  |
| rs7183877  | 15  | 26,039,328 | OCA2/HERC2 | C/A     | 0.08 | 29.54 | 21.57 | 2.275 (1.77 - 2.78)    | 9.732 (5.86 - 16.16) |
| rs12896399 | 14  | 91,843,416 | SLC24A4    | G/T     | 0.44 | 22.82 | 19.49 | -0.546 (-0.66 - -0.44) | 0.579 (0.52 - 0.65)  |
| rs4904866  | 14  | 91,838,256 | SLC24A4    | C/T     | 0.44 | 22.72 | 19.39 | -0.545 (-0.65 - -0.44) | 0.580 (0.52 - 0.65)  |
| rs4778241  | 15  | 26,012,308 | OCA2/HERC2 | C/A     | 0.17 | 17.26 | 13.85 | 0.886 (0.68 - 1.10)    | 2.426 (1.96 - 2.99)  |
| rs4904868  | 14  | 91,850,754 | SLC24A4    | C/T     | 0.45 | 16.80 | 13.61 | 0.471 (0.36 - 0.58)    | 1.602 (1.43 - 1.79)  |
| rs1847134  | 11  | 88,644,901 | TYR        | A/C     | 0.32 | 14.95 | 13.13 | -0.461 (-0.57 - -0.35) | 0.631 (0.56 - 0.71)  |
| rs1393350  | 11  | 88,650,694 | TYR        | G/A     | 0.27 | 12.86 | 10.86 | -0.444 (-0.56 - -0.33) | 0.642 (0.57 - 0.72)  |
| rs10765198 | 11  | 88,609,422 | TYR        | T/C     | 0.29 | 11.55 | 9.75  | -0.414 (-0.53 - -0.30) | 0.661 (0.59 - 0.74)  |
| rs1827430  | 11  | 88,658,088 | TYR        | A/G     | 0.38 | 10.97 | 8.93  | -0.377 (-0.49 - -0.27) | 0.686 (0.61 - 0.77)  |
| rs11018528 | 11  | 88,570,025 | TYR        | A/G     | 0.30 | 10.48 | 8.73  | -0.391 (-0.51 - -0.27) | 0.676 (0.60 - 0.76)  |
| rs4904864  | 14  | 91,834,272 | SLC24A4    | G/A     | 0.35 | 10.07 | 7.48  | 0.375 (0.26 - 0.49)    | 1.455 (1.30 - 1.63)  |
| rs7120151  | 11  | 88,380,027 | TYR        | G/A     | 0.29 | 9.61  | 8.19  | -0.375 (-0.49 - -0.26) | 0.687 (0.61 - 0.77)  |
| rs1806319  | 11  | 88,677,584 | TYR        | T/C     | 0.37 | 9.35  | 7.37  | -0.348 (-0.46 - -0.24) | 0.706 (0.63 - 0.79)  |
| rs1800407  | 15  | 25,903,913 | OCA2/HERC2 | C/T     | 0.08 | 8.70  | 5.46  | 0.743 (0.49 - 0.99)    | 2.102 (1.63 - 2.70)  |
| rs7495174  | 15  | 26,017,833 | OCA2/HERC2 | A/G     | 0.06 | 7.58  | 4.70  | 1.303 (0.79 - 1.81)    | 3.679 (2.21 - 6.12)  |
| rs1391880  | 11  | 88,035,044 | TYR        | A/G     | 0.30 | 7.43  | 6.06  | -0.318 (-0.43 - -0.20) | 0.728 (0.65 - 0.82)  |

**Table 10.** All SNPs with scores over 7 for eye color, green versus blue.

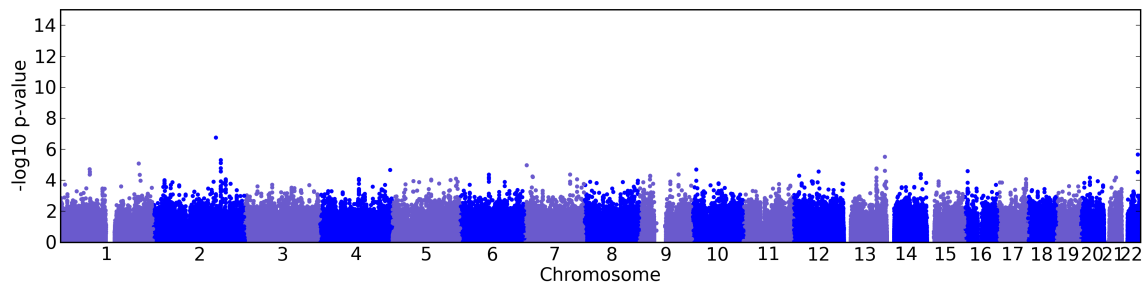

(a) Footedness

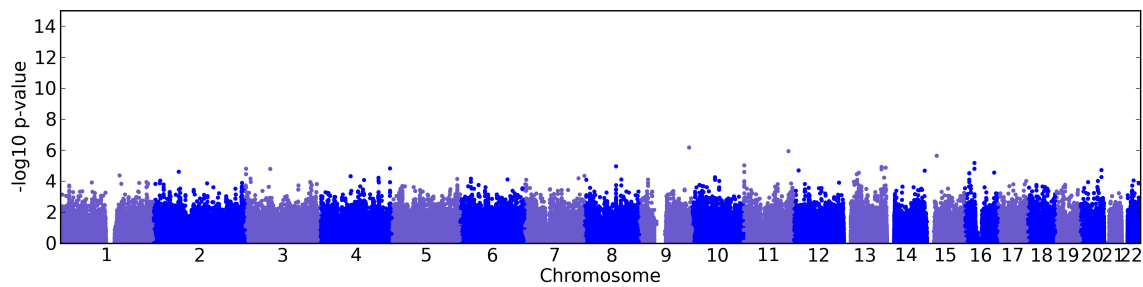

(b) Astigmatism

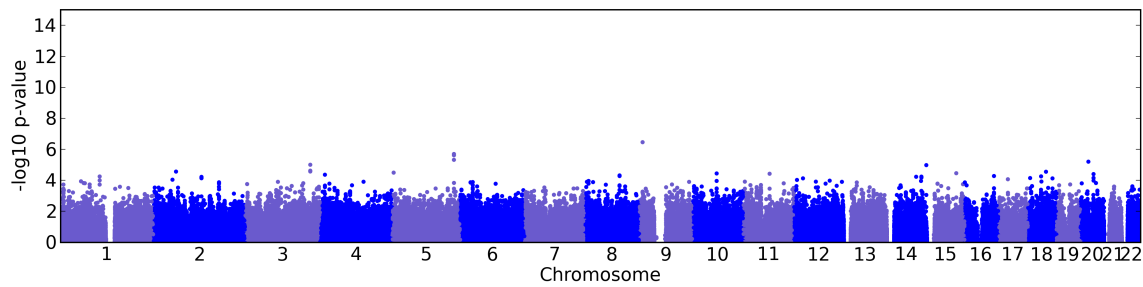

(c) Braces

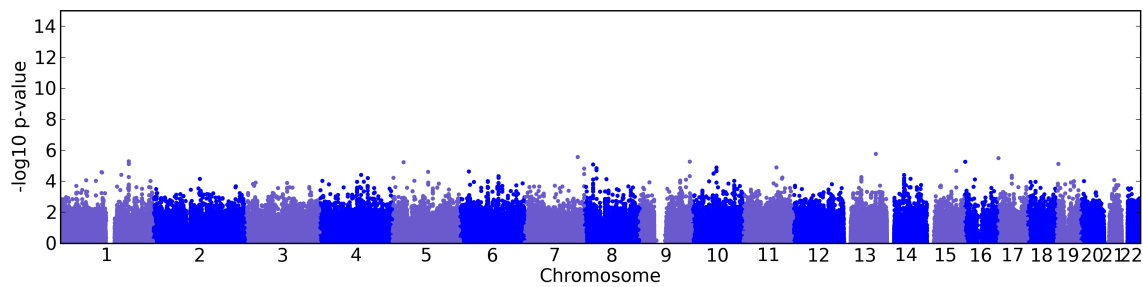

(d) Glasses

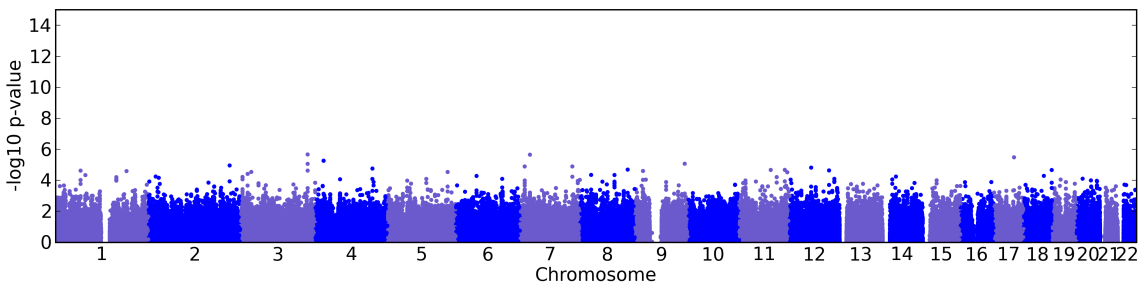

(e) Hand clasp

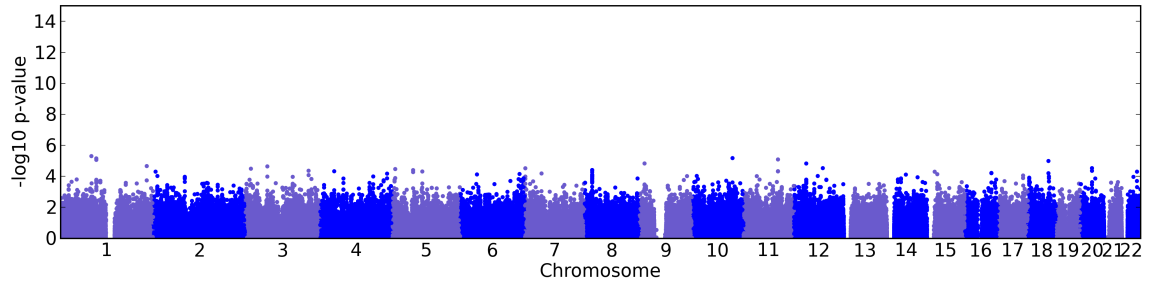

(f) Handedness

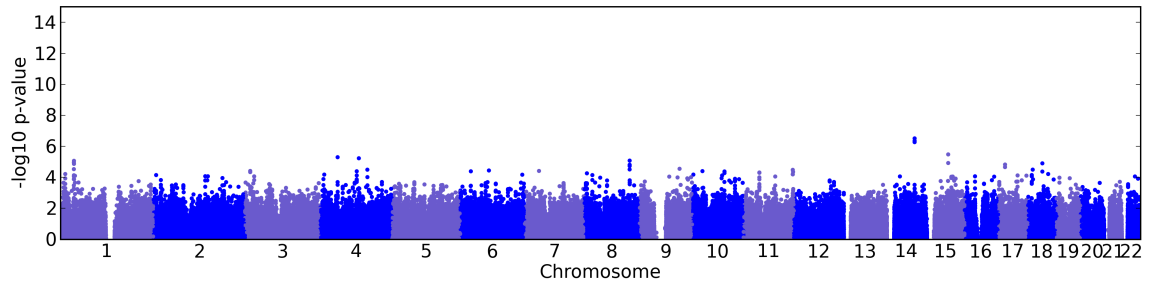

(g) Morningness

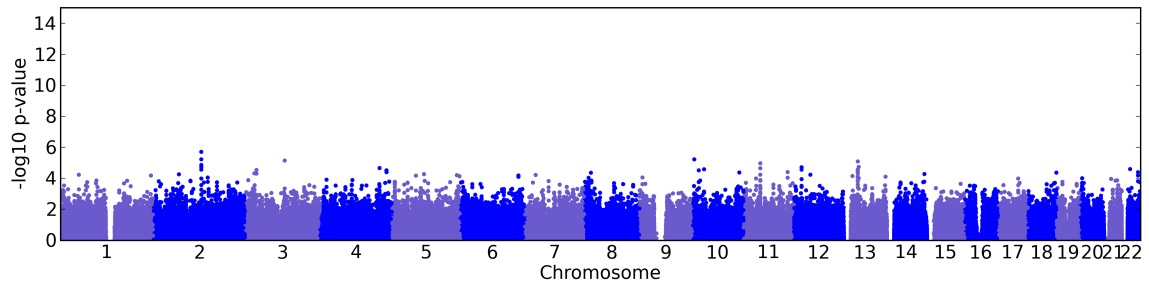

(h) Ocular dominance

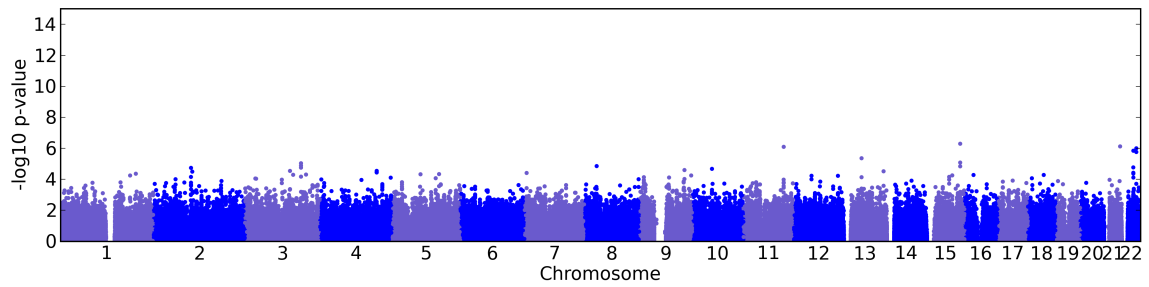

(i) Optimism

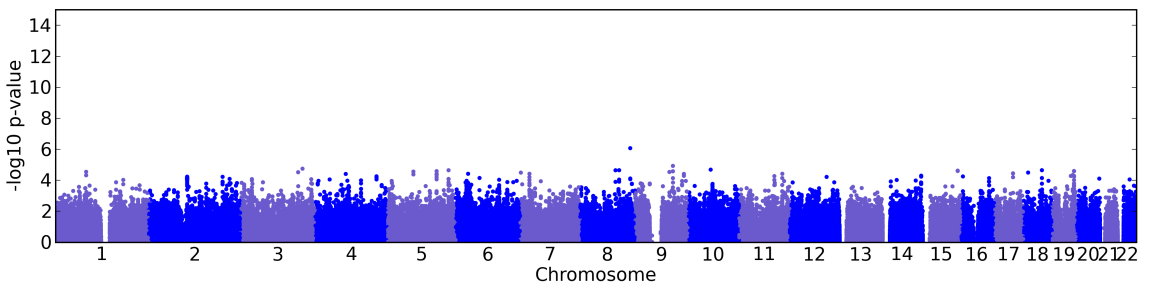

(j) Sweet tooth

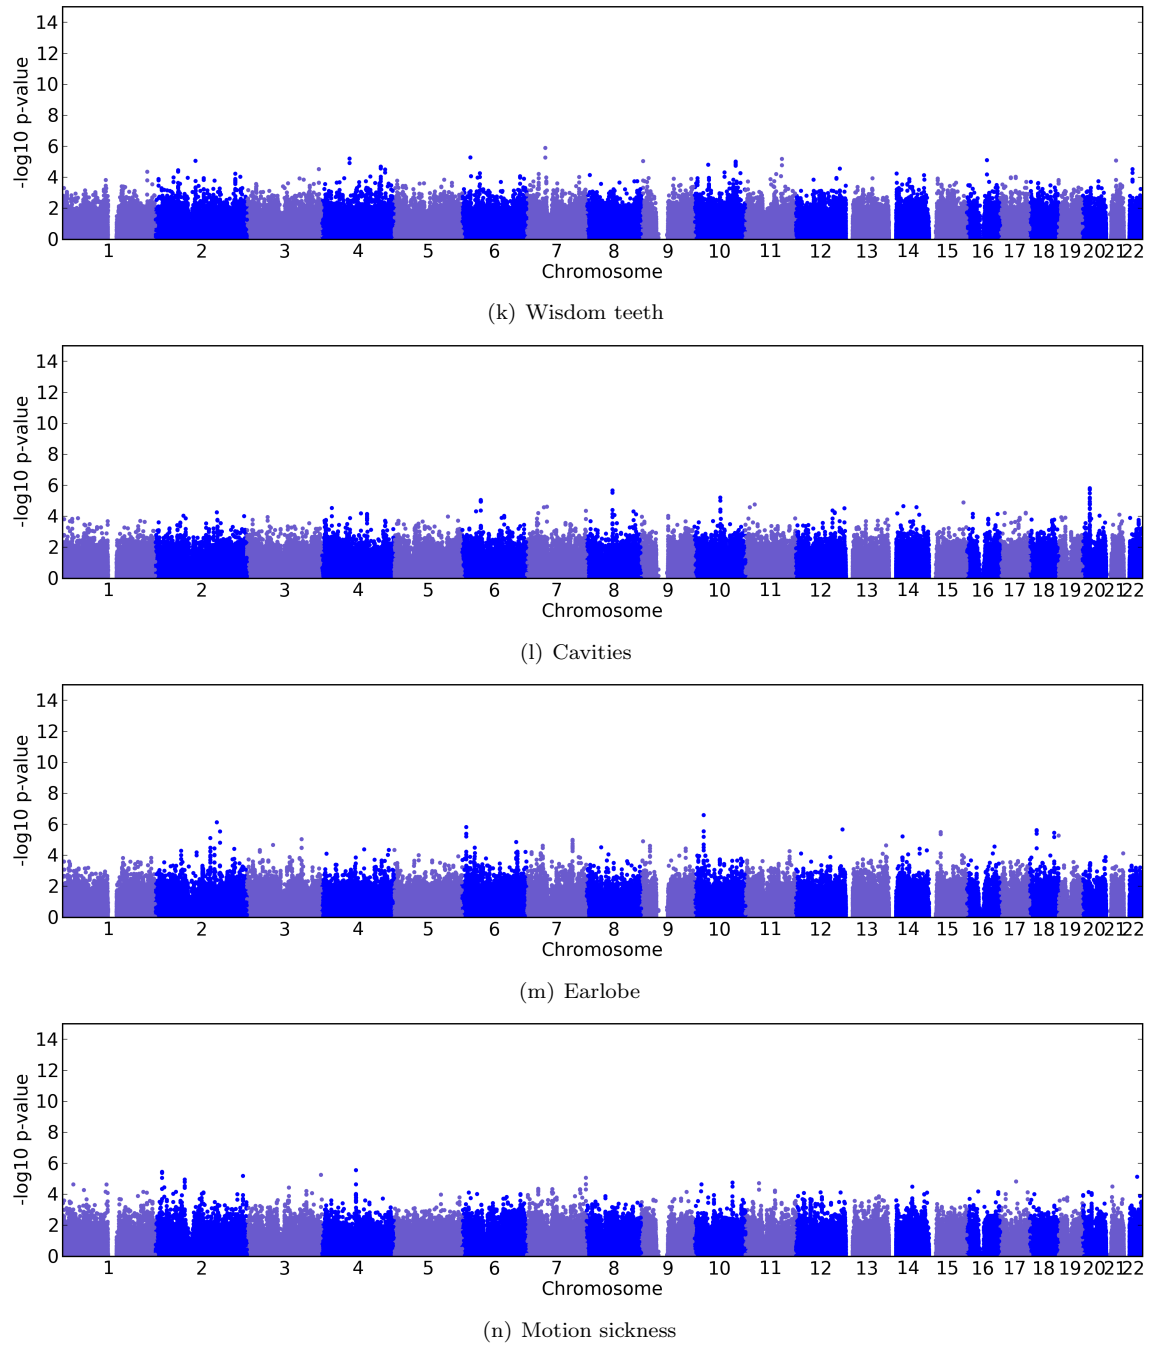

**Figure 8.** Manhattan plots for traits not included elsewhere.

## References

1. Devlin B, Roeder K (1999) Genomic control for association studies. *Biometrics* 55: 997–1004.

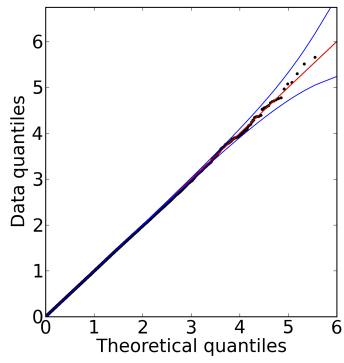

(a) Footedness

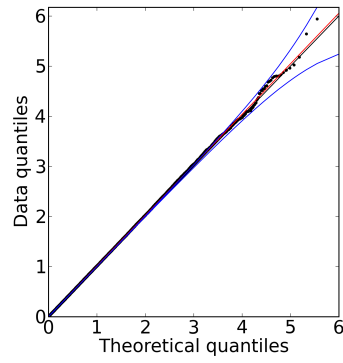

(b) Astigmatism

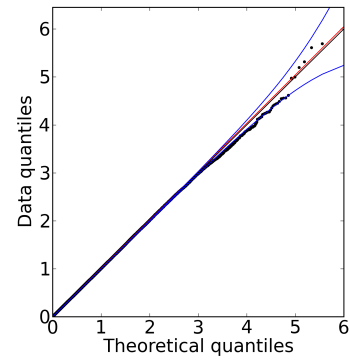

(c) Braces

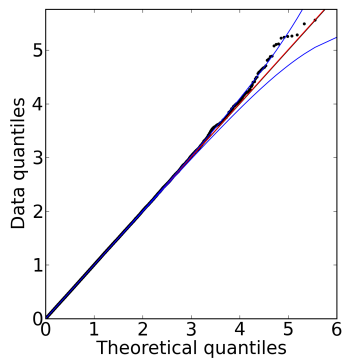

(d) Glasses

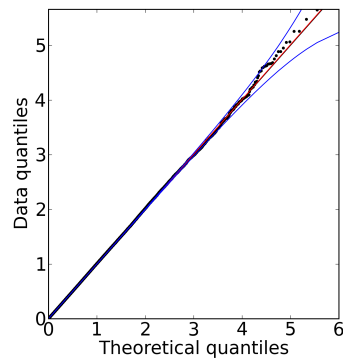

(e) Hand clasp

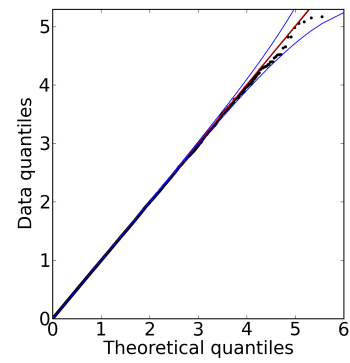

(f) Handedness

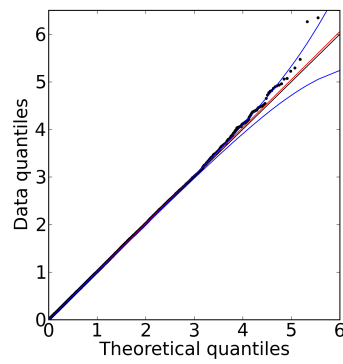

(g) Morningness



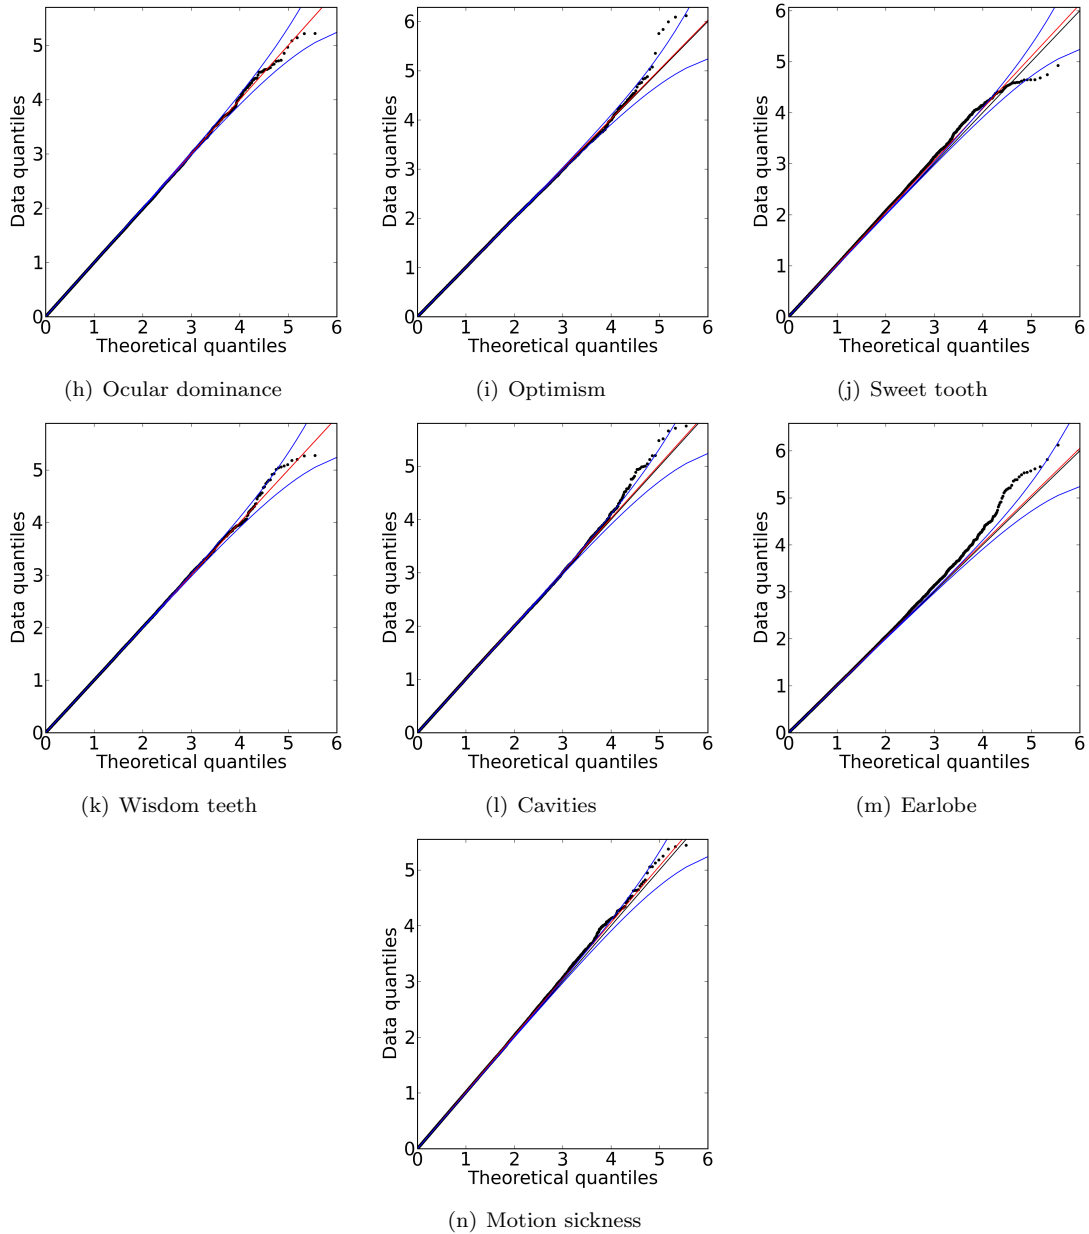

**Figure 9.** Quantile-quantile plots for traits not included elsewhere.
