# Supplementary material for: Web-Based, Participant-Driven Studies Yield Novel Genetic Associations for Common Traits
Source: PLoS Genet. 2010 Jun 24;6(6):e1000993. doi: 10.1371/journal.pgen.1000993 (PMC2891811; doi:10.1371/journal.pgen.1000993)
Supplement: Table S1 — All significant and marginal SNPs for the 22 studies. All SNPs with p-values under 10−6 for the 22 studies. (0.04 MB XLS) [file pgen.1000993.s001.xls]

## Sheet: supplemental_table_revision.csv
Phenotype	rsid	Chromosome	Position	-log10 p-value
sweettooth	rs2014357	8	133172472	6.07
haircolor	rs11636232	15	26060221	14.53
haircolor	rs4778138	15	26009415	14.4
haircolor	rs12203592	6	341321	27.64
haircolor	rs12210050	6	420489	8.14
haircolor	rs12896399	14	91843416	12.34
haircolor	rs12913832	15	26039213	87.07
haircolor	rs13263959	8	142701497	6.12
haircolor	rs1667394	15	26203777	48.55
haircolor	rs16950979	15	26194101	14.25
haircolor	rs16950987	15	26199823	15.41
haircolor	rs17128162	14	91850110	7.51
haircolor	rs2240204	15	26167627	14.25
haircolor	rs35391	5	33991430	14.62
haircolor	rs3750965	11	68596736	6.59
haircolor	rs40132	5	33986460	9.65
haircolor	rs4778211	15	25872900	8.14
haircolor	rs4904864	14	91834272	7.48
haircolor	rs4904866	14	91838256	12.15
haircolor	rs4904868	14	91850754	7.89
haircolor	rs4935969	11	125801799	6.4
haircolor	rs4778241	15	26012308	29.87
haircolor	rs6575242	14	91829126	6.07
haircolor	rs6918152	6	487159	7.07
haircolor	rs7174027	15	26002360	10.07
haircolor	rs7183877	15	26039328	21.15
haircolor	rs731974	11	68603732	6.26
haircolor	rs7495174	15	26017833	15.2
haircolor	rs8028689	15	26162483	14.87
haircolor	rs8039195	15	26189679	40.89
haircolor	rs9392056	6	463078	7.03
haircolor	rs12931267	16	88346233	9.48
haircolor	rs16891982	5	33987450	19.41
haircolor	rs26722	5	33999627	7.75
haircolor	rs35394	5	33984076	9.85
haircolor	rs35398	5	33987583	9.85
haircolor	rs35390	5	33991083	13.78
haircolor	rs35408	5	34000695	11.19
haircolor	rs35412	5	34002902	11.19
astigmatism	rs7866070	9	131483920	6.17
asparagus	rs10788759	1	246417399	8.75
asparagus	rs4244187	1	246560134	22.02
asparagus	rs4309013	1	246547391	22.27
asparagus	rs4481887	1	246563486	23.18
asparagus	rs4559542	1	246556603	7.75
asparagus	rs4642918	1	246477680	13.12
asparagus	rs4916113	1	246443915	14.51
asparagus	rs6587440	1	246482285	19.85
asparagus	rs7349159	1	246452865	13.22
asparagus	rs7537031	1	246409460	6.01
asparagus	rs7550630	1	246428934	14.69
asparagus	rs7555310	1	246554261	21.72
asparagus	rs9435891	1	246411221	8.71
asparagus	rs1544175	1	246590885	8.1
morningness	rs7153587	14	73579413	6.26
morningness	rs2072293	14	73607638	6.35
morningness	rs2239557	14	73621723	6.5
green-eyecolor	rs10765198	11	88609422	11.55
green-eyecolor	rs10830236	11	88540464	6.56
green-eyecolor	rs11018528	11	88570025	10.48
green-eyecolor	rs11636232	15	26060221	6.95
green-eyecolor	rs12203592	6	341321	6.56
green-eyecolor	rs12795125	11	88184662	6.59
green-eyecolor	rs12896399	14	91843416	22.82
green-eyecolor	rs12913832	15	26039213	51.52
green-eyecolor	rs1391880	11	88035044	7.43
green-eyecolor	rs1393350	11	88650694	12.86
green-eyecolor	rs1667394	15	26203777	36.09
green-eyecolor	rs1806319	11	88677584	9.35
green-eyecolor	rs1847134	11	88644901	14.95
green-eyecolor	rs4904864	14	91834272	10.07
green-eyecolor	rs4904866	14	91838256	22.72
green-eyecolor	rs4904868	14	91850754	16.8
green-eyecolor	rs4778241	15	26012308	17.26
green-eyecolor	rs7120151	11	88380027	9.61
green-eyecolor	rs7183877	15	26039328	29.54
green-eyecolor	rs7481199	11	87998192	6.93
green-eyecolor	rs7495174	15	26017833	7.58
green-eyecolor	rs8039195	15	26189679	32.86
green-eyecolor	rs1827430	11	88658088	10.97
green-eyecolor	rs1800407	15	25903913	8.7
sneeze	rs1006134	2	145852089	8.42
sneeze	rs1040173	2	145836981	8.54
sneeze	rs10427255	2	145841993	10.93
sneeze	rs11856995	15	94126647	7.13
sneeze	rs17410058	2	145851244	7.99
sneeze	rs4422110	2	145831368	10.58
sneeze	rs6721116	2	145872667	9.79
sneeze	rs6903896	6	31276008	6.23
eyecolor	rs10765198	11	88609422	6.58
eyecolor	rs10809808	9	12614463	6.31
eyecolor	rs10960751	9	12665264	7.54
eyecolor	rs1107267	15	25645234	11.76
eyecolor	rs11635884	15	26042564	19.3
eyecolor	rs11636232	15	26060221	115.29
eyecolor	rs4778138	15	26009415	135.65
eyecolor	rs12203592	6	341321	14.69
eyecolor	rs12896399	14	91843416	15.95
eyecolor	rs12910433	15	25902239	22.4
eyecolor	rs12913832	15	26039213	500
eyecolor	rs1325127	9	12658328	6.51
eyecolor	rs13329466	15	25950357	9.1
eyecolor	rs1391880	11	88035044	6.07
eyecolor	rs1393350	11	88650694	8.49
eyecolor	rs1408799	9	12662097	7.42
eyecolor	rs1448485	15	25956336	33.58
eyecolor	rs1448488	15	25890452	23.16
eyecolor	rs1470608	15	25961716	42.49
eyecolor	rs1498519	15	25685246	6.77
eyecolor	rs1597196	15	25968517	31.88
eyecolor	rs1667394	15	26203777	500
eyecolor	rs16950821	15	25957102	29.69
eyecolor	rs16950979	15	26194101	117.42
eyecolor	rs16950987	15	26199823	125.44
eyecolor	rs438702	15	26798209	8.49
eyecolor	rs17565953	15	25692250	10.94
eyecolor	rs1847134	11	88644901	7.57
eyecolor	rs2240204	15	26167627	117.51
eyecolor	rs2311469	15	25742663	8.35
eyecolor	rs2594897	15	25818645	6.35
eyecolor	rs2594909	15	25824657	7.27
eyecolor	rs2594935	15	25858633	19.23
eyecolor	rs2703952	15	25855576	17.06
eyecolor	rs2703978	15	25820801	6.04
eyecolor	rs1137134	9	12702157	7.1
eyecolor	rs2871875	15	25938449	12.57
eyecolor	rs35391	5	33991430	8.08
eyecolor	rs3794604	15	25945660	23.37
eyecolor	rs3930739	15	25713937	11.38
eyecolor	rs4778189	15	25745823	8.43
eyecolor	rs4778192	15	25753656	8.66
eyecolor	rs4778211	15	25872900	27.02
eyecolor	rs4778220	15	25894733	20.58
eyecolor	rs4778232	15	25955360	38.75
eyecolor	rs4904864	14	91834272	9.17
eyecolor	rs4904866	14	91838256	15.81
eyecolor	rs4904868	14	91850754	13.49
eyecolor	rs6497238	15	25727373	10.43
eyecolor	rs4778241	15	26012308	232.34
eyecolor	rs7120151	11	88380027	6.37
eyecolor	rs7170451	15	25865819	26.48
eyecolor	rs7170869	15	25962343	42.01
eyecolor	rs7174027	15	26002360	96.16
eyecolor	rs7178315	15	25911504	14.2
eyecolor	rs7179994	15	25997365	28.05
eyecolor	rs7183877	15	26039328	120.28
eyecolor	rs728405	15	25873448	19.91
eyecolor	rs7495174	15	26017833	124.09
eyecolor	rs7496968	15	25984569	9.88
eyecolor	rs2703936	15	25831670	7.06
eyecolor	rs8024968	15	25957284	30.02
eyecolor	rs8028689	15	26162483	122.42
eyecolor	rs8035334	15	25753962	8.02
eyecolor	rs8036718	15	25727152	10.63
eyecolor	rs8039195	15	26189679	291.35
eyecolor	rs927869	9	12738962	6.98
eyecolor	rs977588	15	25852901	8.55
eyecolor	rs977589	15	25853198	13.76
eyecolor	rs11631195	15	25695483	9.27
eyecolor	rs1037208	15	25904952	19.9
eyecolor	rs16891982	5	33987450	11.83
eyecolor	rs1800401	15	25933648	6.79
eyecolor	rs1800404	15	25909368	14.47
eyecolor	rs1800411	15	25885516	22.98
eyecolor	rs2733832	9	12694725	6.49
eyecolor	rs6497253	15	25962144	43.47
eyecolor	rs749846	15	25942585	34.53
eyecolor	rs35390	5	33991083	7.86
eyecolor	rs35408	5	34000695	7.27
eyecolor	rs35412	5	34002902	7.12
eyecolor	rs7181045	15	27102064	6.44
eyecolor	rs1800407	15	25903913	23.49
eyecolor	rs1900758	15	25903692	22.29
red-hair	rs11648785	16	88612062	8.47
red-hair	rs11861084	16	88403211	19.09
red-hair	rs1205339	20	32388628	6.36
red-hair	rs12203592	6	341321	6.36
red-hair	rs12443954	16	88268997	6.16
red-hair	rs12599531	16	88436902	14.15
red-hair	rs1535466	20	33182367	6.54
red-hair	rs164741	16	88219799	34.29
red-hair	rs16966142	16	88378534	7.85
red-hair	rs17305657	20	31270249	12.31
red-hair	rs17396317	20	31254038	9
red-hair	rs1800286	16	88397262	18.63
red-hair	rs1800359	16	88332762	17.9
red-hair	rs1998233	20	33120787	6.39
red-hair	rs2241032	16	88637020	6.51
red-hair	rs2241039	16	88615938	15.39
red-hair	rs2281695	20	32592825	6.58
red-hair	rs2306633	16	87882779	9.1
red-hair	rs2353033	16	87913062	13.93
red-hair	rs2378199	20	32650141	7.71
red-hair	rs2378249	20	32681751	7.77
red-hair	rs258322	16	88283404	56.77
red-hair	rs291671	20	31414506	14.7
red-hair	rs352935	16	88176081	17.37
red-hair	rs382745	16	88131087	7.86
red-hair	rs4238833	16	88578190	42.77
red-hair	rs4347628	16	88098136	8.42
red-hair	rs4408545	16	88571529	24.23
red-hair	rs447735	16	88261850	9.85
red-hair	rs459920	16	88258328	10.77
red-hair	rs460879	16	88240390	11.77
red-hair	rs463701	16	88126261	8.07
red-hair	rs464349	16	88183752	10.75
red-hair	rs4785755	16	88565329	6.29
red-hair	rs4785763	16	88594437	49.68
red-hair	rs4812405	20	34709999	7.42
red-hair	rs4911442	20	32818707	7.23
red-hair	rs6059908	20	32595820	6.42
red-hair	rs6060034	20	32815525	6.77
red-hair	rs6060043	20	32828245	6.79
red-hair	rs6060301	20	33246903	6.1
red-hair	rs619865	20	33331111	9.89
red-hair	rs6500437	16	88317399	8.58
red-hair	rs6500452	16	88386006	7.02
red-hair	rs7188458	16	88253985	20.14
red-hair	rs7195066	16	88363824	11.1
red-hair	rs7196459	16	88668978	11.31
red-hair	rs7204478	16	88322986	21.9
red-hair	rs7361656	20	33192808	7.11
red-hair	rs8049897	16	88551703	42.38
red-hair	rs8058895	16	88342308	12.56
red-hair	rs8060934	16	88447526	16.24
red-hair	rs9936215	16	88609161	6.61
red-hair	rs9936896	16	88596560	9.87
red-hair	rs7189734	16	88328051	7.39
red-hair	rs1061646	16	88333478	8.04
red-hair	rs12931267	16	88346233	86.28
red-hair	rs1800345	16	88342718	7.34
red-hair	rs1805008	16	88513645	37.48
red-hair	rs2016571	16	88371777	8.2
red-hair	rs2159116	16	88359011	12.58
red-hair	rs2239360	16	88377084	6.4
red-hair	rs3785275	16	88369530	7.87
red-hair	i3002507	16	88514047	17.43
braces	rs1535480	9	7915381	6.45
optimism	rs10431058	11	106986728	6.09
optimism	rs7178909	15	88248950	6.29
optimism	rs425215	21	42580170	6.12
haircurl	rs10177996	2	219454805	8.45
haircurl	rs1053590	1	150755052	7.09
haircurl	rs10788819	1	150161717	6.88
haircurl	rs11585118	1	17478361	7.65
haircurl	rs12116609	1	150764309	7.38
haircurl	rs1333652	6	10381949	7.54
haircurl	rs1333657	6	10404322	7.42
haircurl	rs1556547	6	10378363	7.81
haircurl	rs1556548	6	10378372	7.54
haircurl	rs17646946	1	150329391	41.8
haircurl	rs2105117	1	150750753	7.01
haircurl	rs3007671	1	150265971	27.22
haircurl	rs3007684	1	150301054	9.89
haircurl	rs3753451	1	150751851	7.13
haircurl	rs4240887	1	150797134	7.5
haircurl	rs4672907	2	219529413	8.24
haircurl	rs4845779	1	150745800	10.03
haircurl	rs6587673	1	150696776	7.55
haircurl	rs6700998	1	150700633	7.48
haircurl	rs6723140	2	219482944	8.79
haircurl	rs7349332	2	219464627	13.48
haircurl	rs499697	1	150759778	9.95
earlobes	rs11013962	10	24535592	6.59
earlobes	rs2270447	2	162667994	6.12
freckle	rs1033180	6	328546	6.41
freckle	rs1042602	11	88551344	7.23
freckle	rs1050975	6	353012	6.09
freckle	rs10756819	9	16848084	6.69
freckle	rs9503644	6	360406	7.11
freckle	rs11648785	16	88612062	8.96
freckle	rs11861084	16	88403211	11.27
freckle	rs12203592	6	341321	90.68
freckle	rs12210050	6	420489	18.58
freckle	rs12599531	16	88436902	8.32
freckle	rs1339548	9	16836323	7.39
freckle	rs1474976	20	34195786	9.5
freckle	rs1540771	6	411033	13.24
freckle	rs154659	16	88194838	8.62
freckle	rs164741	16	88219799	20.13
freckle	rs17305657	20	31270249	9.82
freckle	rs17396317	20	31254038	7.99
freckle	rs1800286	16	88397262	9.85
freckle	rs1800359	16	88332762	9.04
freckle	rs2153271	9	16854521	9.4
freckle	rs2241039	16	88615938	10.98
freckle	rs2268086	20	32112399	7.25
freckle	rs2268089	20	32130959	9.08
freckle	rs2284378	20	32051756	9.22
freckle	rs2306633	16	87882779	6.69
freckle	rs2353033	16	87913062	13.41
freckle	rs2378199	20	32650141	6.44
freckle	rs2378249	20	32681751	6.32
freckle	rs2424994	20	32596578	7.22
freckle	rs258322	16	88283404	44.31
freckle	rs291671	20	31414506	12.04
freckle	rs352935	16	88176081	11.71
freckle	rs3778607	6	348799	12.67
freckle	rs382745	16	88131087	8.28
freckle	rs4238833	16	88578190	26.9
freckle	rs4408545	16	88571529	20.2
freckle	rs463701	16	88126261	8.53
freckle	rs464349	16	88183752	10.2
freckle	rs4785763	16	88594437	34.32
freckle	rs4812405	20	34709999	9.7
freckle	rs4911145	20	32078884	7.22
freckle	rs4911379	20	31998966	8.93
freckle	rs4911414	20	32193105	8.52
freckle	rs4911442	20	32818707	10.24
freckle	rs4959270	6	402748	11.93
freckle	rs6060612	20	33853941	9.2
freckle	rs6060891	20	34338559	7.01
freckle	rs6088316	20	31890503	10.4
freckle	rs6142050	20	31990789	6.89
freckle	rs619865	20	33331111	13.26
freckle	rs7033354	9	16894846	6.46
freckle	rs7188458	16	88253985	12.33
freckle	rs7195066	16	88363824	10.12
freckle	rs7196459	16	88668978	11.59
freckle	rs7204478	16	88322986	10.61
freckle	rs761238	20	31983649	9.9
freckle	rs7757906	6	357741	6.02
freckle	rs8049897	16	88551703	29.79
freckle	rs8058895	16	88342308	6.22
freckle	rs8060934	16	88447526	8.86
freckle	rs872071	6	356064	14.38
freckle	rs9328192	6	379364	9.39
freckle	rs9378805	6	362727	12.91
freckle	rs9405675	6	389600	8.72
freckle	rs9405681	6	394358	7.34
freckle	rs950039	6	438976	6.32
freckle	rs950286	6	374457	7.4
freckle	rs9936896	16	88596560	6.27
freckle	rs12931267	16	88346233	61.08
freckle	rs1805006	16	88513419	6.02
freckle	rs1805008	16	88513645	23.18
freckle	rs2159116	16	88359011	6.35
freckle	i3002507	16	88514047	17.32
freckle	rs11547464	16	88513592	12.85
footedness	rs776488	2	165598979	6.75
